# Supplementary material
Source: PubMed Central journal article supplement (PMC8377745)
Supplement: NIHMS1733761-supplement-SUPPORTING.pdf [file NIHMS1733761-supplement-SUPPORTING.pdf]

## Supporting Information

### Investigation of the Experimental Parameters of Ultraviolet Photodissociation for the Structural Characterization of Chondroitin Sulfate Glycosaminoglycan Isomers

Lauren E. Pepi<sup>1</sup>; Franklin E. Leach III<sup>2</sup>; Dustin R. Klein<sup>3</sup>; Jennifer S. Brodbelt<sup>4</sup>; I. Jonathan Amster<sup>1\*</sup>

<sup>1</sup>Department of Chemistry, University of Georgia, Athens, GA 30602

<sup>2</sup>Department of Environmental Health Sciences, University of Georgia, Athens, GA 30602

<sup>3</sup>Department of Biochemistry and Mass Spectrometry Research Center, Vanderbilt University, Nashville, TN 37232

<sup>4</sup>Department of Chemistry, University of Texas at Austin, Austin, TX 78712

\* Corresponding Author

Email: [jamster@uga.edu](mailto:jamster@uga.edu)

## Table of Contents

| Content                                                                                          | Figure Number |
|--------------------------------------------------------------------------------------------------|---------------|
| UVPD Orbitrap schematic                                                                          | S1            |
| HCD spectrum of [M-H] <sup>-</sup> of DS dp4                                                     | S2            |
| Zoom in of <sup>1,4</sup> A <sub>4</sub> fragment ion                                            | S3            |
| Zoom in of <sup>2,4</sup> X <sub>2</sub> fragment ion                                            | S4            |
| 193 nm UVPD full spectrum of [M-H] <sup>-</sup> precursor ion of CS-A dp4                        | S5            |
| 193 nm UVPD of [M-4H+Na] <sup>3-</sup> precursor ion of CS-A dp4 and DS dp4                      | S6            |
| MS <sup>3</sup> of DS dp4                                                                        | S7            |
| MS <sup>3</sup> of CS-A dp4                                                                      | S8            |
| DS dp4 annotated structures                                                                      | S9            |
| 193 nm UVPD of [M-2H] <sup>2-</sup> precursor ion using 4 laser pulses in the high-pressure cell | S10           |
| 193 nm UVPD of [M-3H] <sup>3-</sup> precursor ion with 4 laser pulses in the high-pressure cell  | S11           |
| 193 nm UVPD of [M-2H] <sup>2-</sup> precursor ion using 8 laser pulses in the high-pressure cell | S12           |
| 193 nm UVPD of [M-3H] <sup>3-</sup> precursor ion with 8 laser pulses in the high-pressure cell  | S13           |
| 213 nm UVPD spectra of [M-3H] <sup>3-</sup> precursor ion of DS dp4 using 750 laser pulses       | S14           |

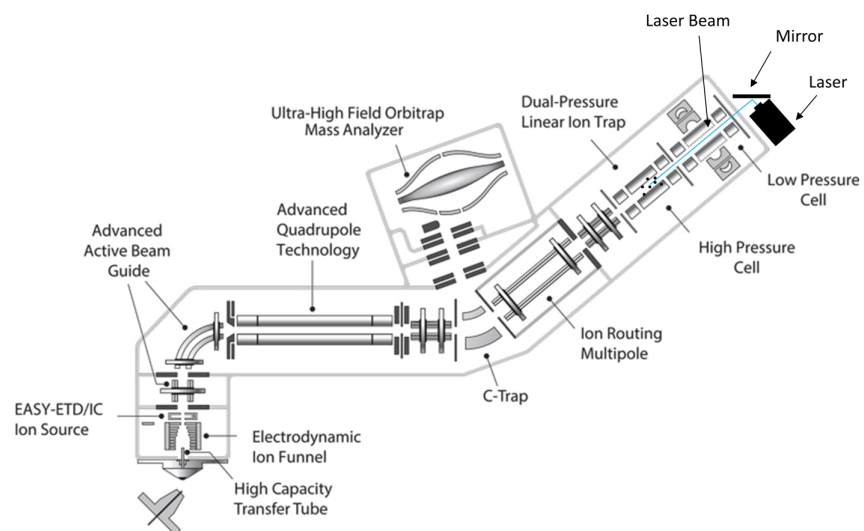

Figure S1. UVPD schematic on a Thermo Fisher Orbitrap Fusion Lumos modified with a Coherent Excistar 193 nm excimer laser or a 213 nm CryLas solid state laser. The position of the laser and mirror are shown in black at the right of the figure, and the path of the laser beam is shown in blue.

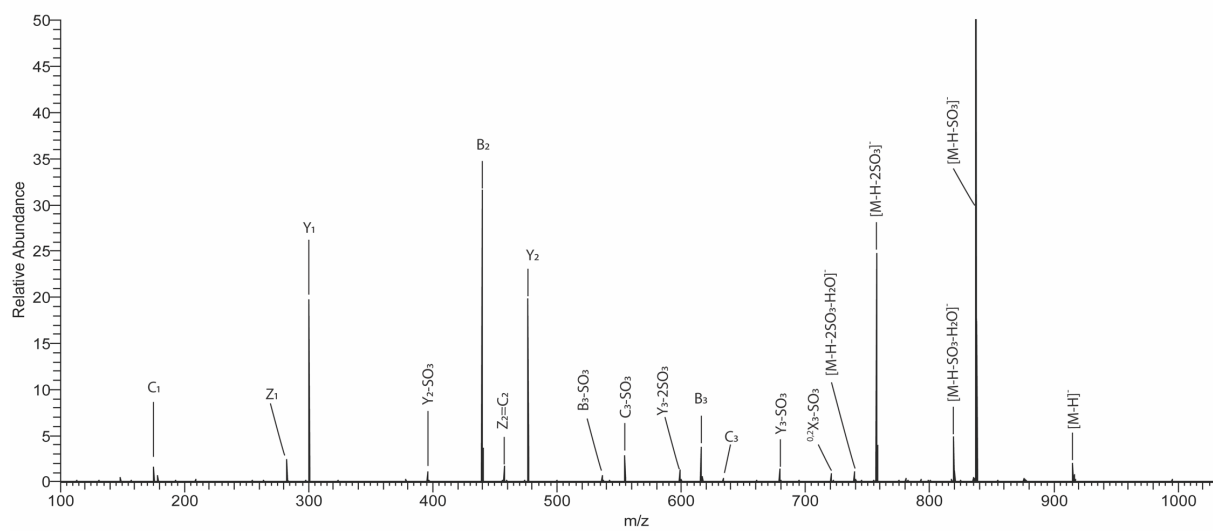

Figure S1. HCD (NCE 25) spectrum of the [M-H]<sup>-</sup> precursor ion of CS-A dp4.

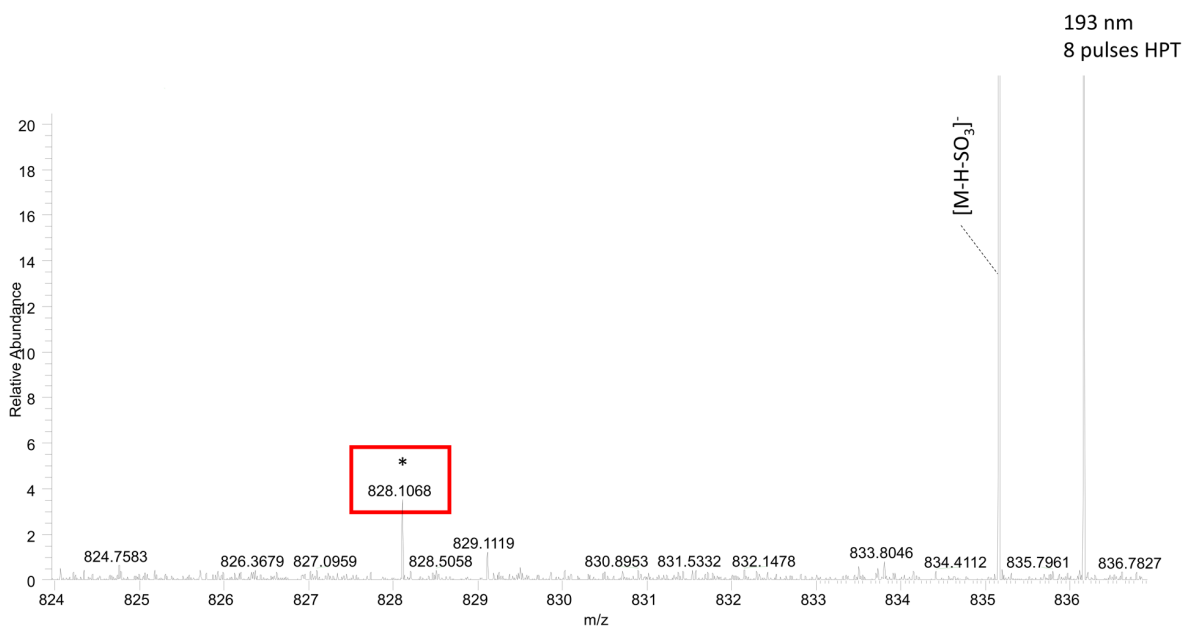

Figure S2. Mass scale expansion focusing on the <sup>1,4</sup>A<sub>4</sub> fragment ion (828.1068 m/z) produced upon UVPD of the [M-H]<sup>-</sup> precursor ion of DS dp4.

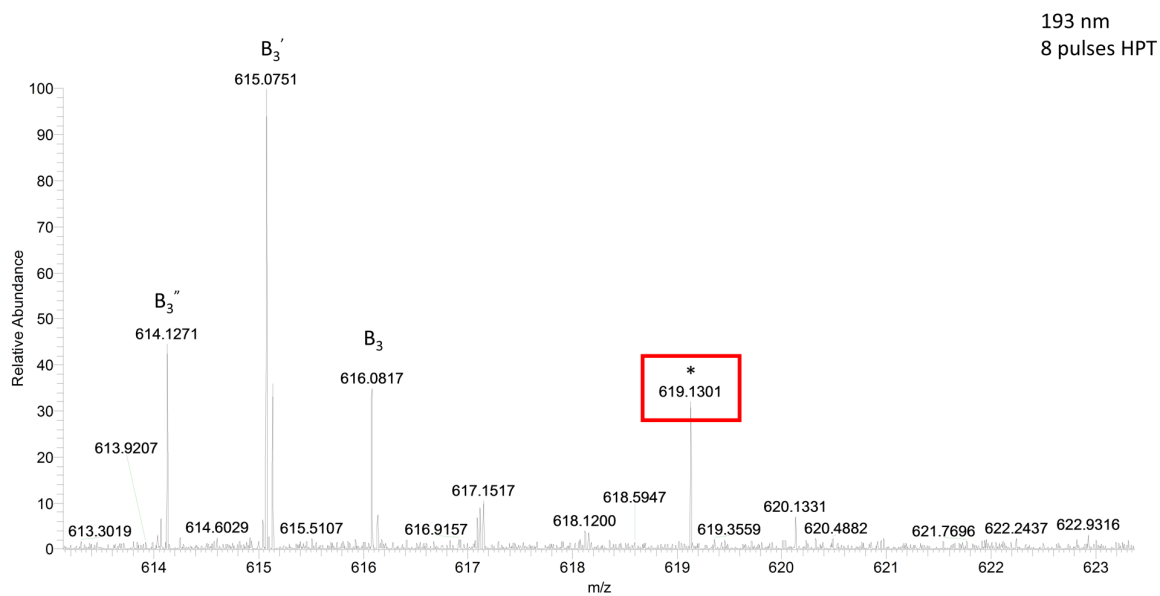

Figure S3. Mass scale expansion focusing on the  $^{2,4}X_2$  fragment ion (619.1301 m/z) produce upon UVPD of the [M-H]- precursor ion of DS dp4.

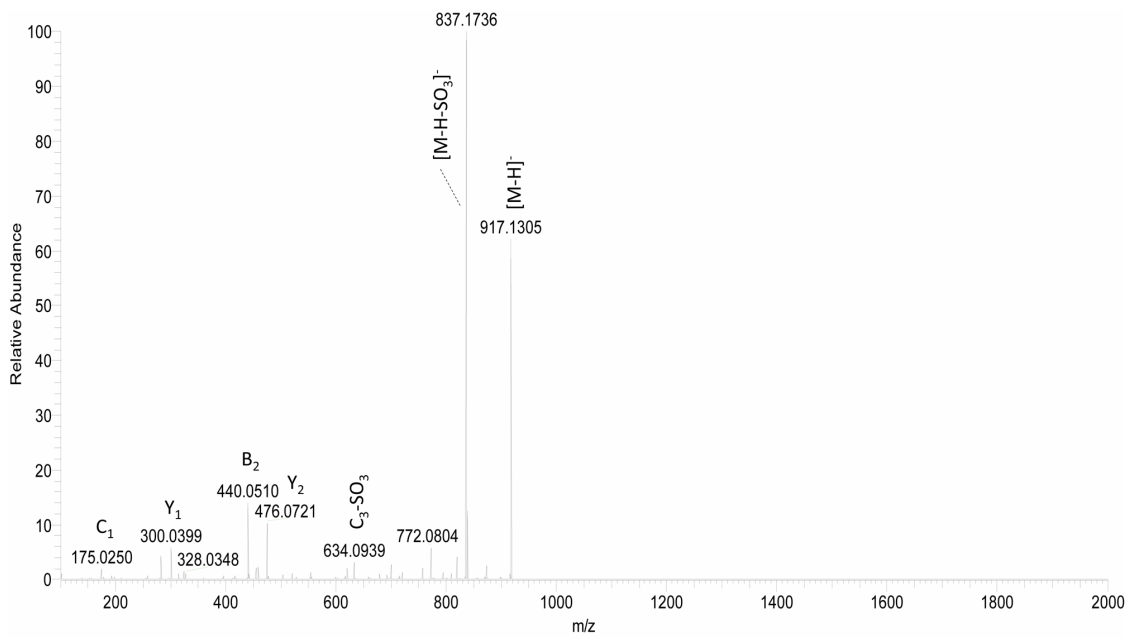

Figure S5. Full scan UVPD spectrum of [M-H]<sup>-</sup> precursor ion of CS-A dp4.

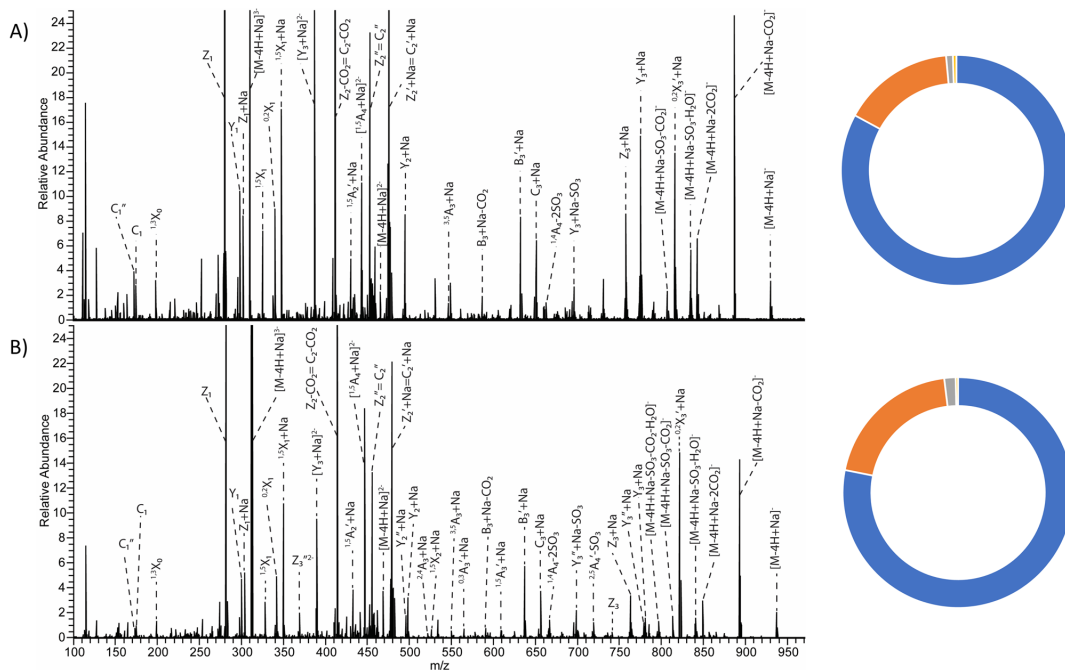

Figure S6. 193 nm UVPD with 8 laser pulses (4 mJ per pulse) in the high-pressure cell of the  $[M-4H+Na]^{3-}$  precursor of DS dp4 (A) and CS-A dp4 (B). Donut plots depict intensity distributions if glycosidic fragments (blue), cross-ring fragments (orange), glycosidic fragments with  $-SO_3$  loss (grey) and cross-ring fragments with  $-SO_3$  loss (yellow). Fragment ion lists are shown in Tables S15 and S16.



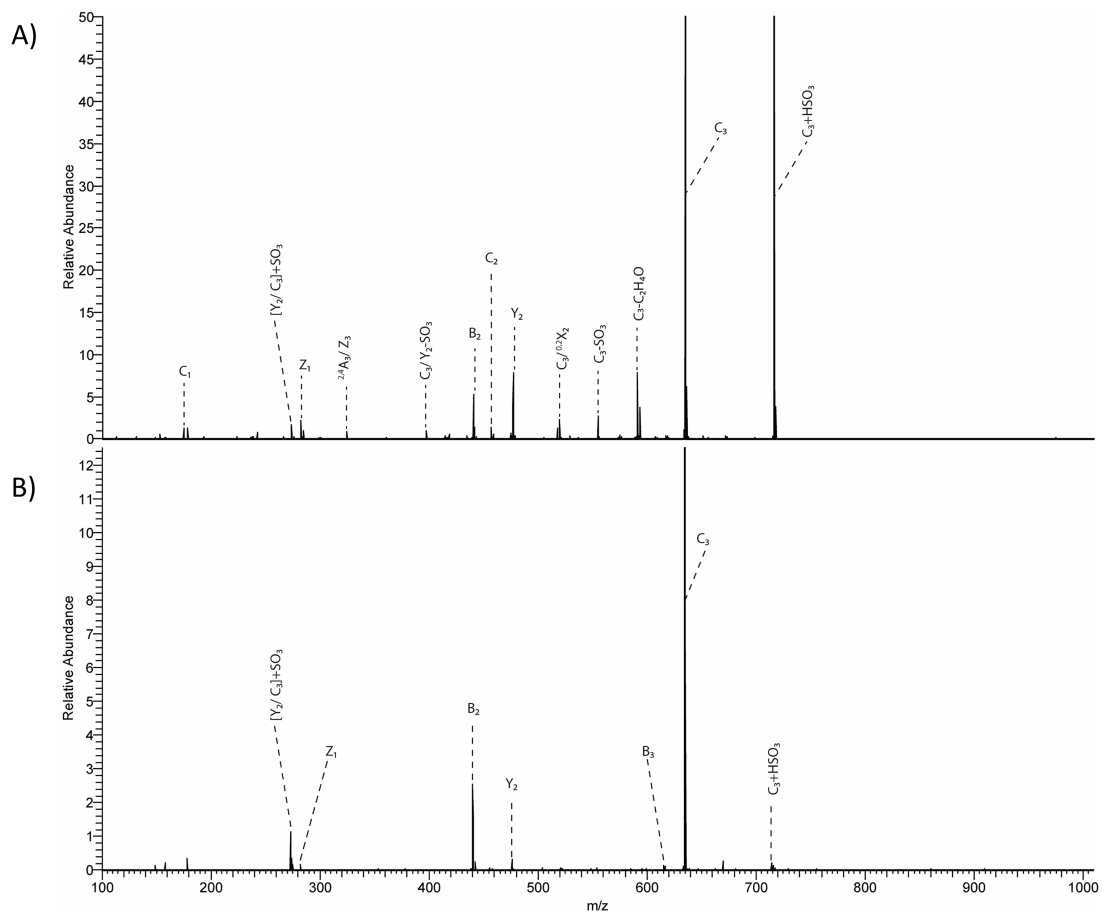

Figure S7. MS<sup>3</sup> activation of the fragment ion m/z 715.05 of DS dp4 using (A) 193 nm UVPD (8 pulses, 4 mJ)/ 193 nm UVPD (8 pulses, 4 mJ) and (B) 193 nm UVPD (8 pulses, 4 mJ)/ HCD (NCE 20). Fragment ion lists are shown in Tables S23 and S24.

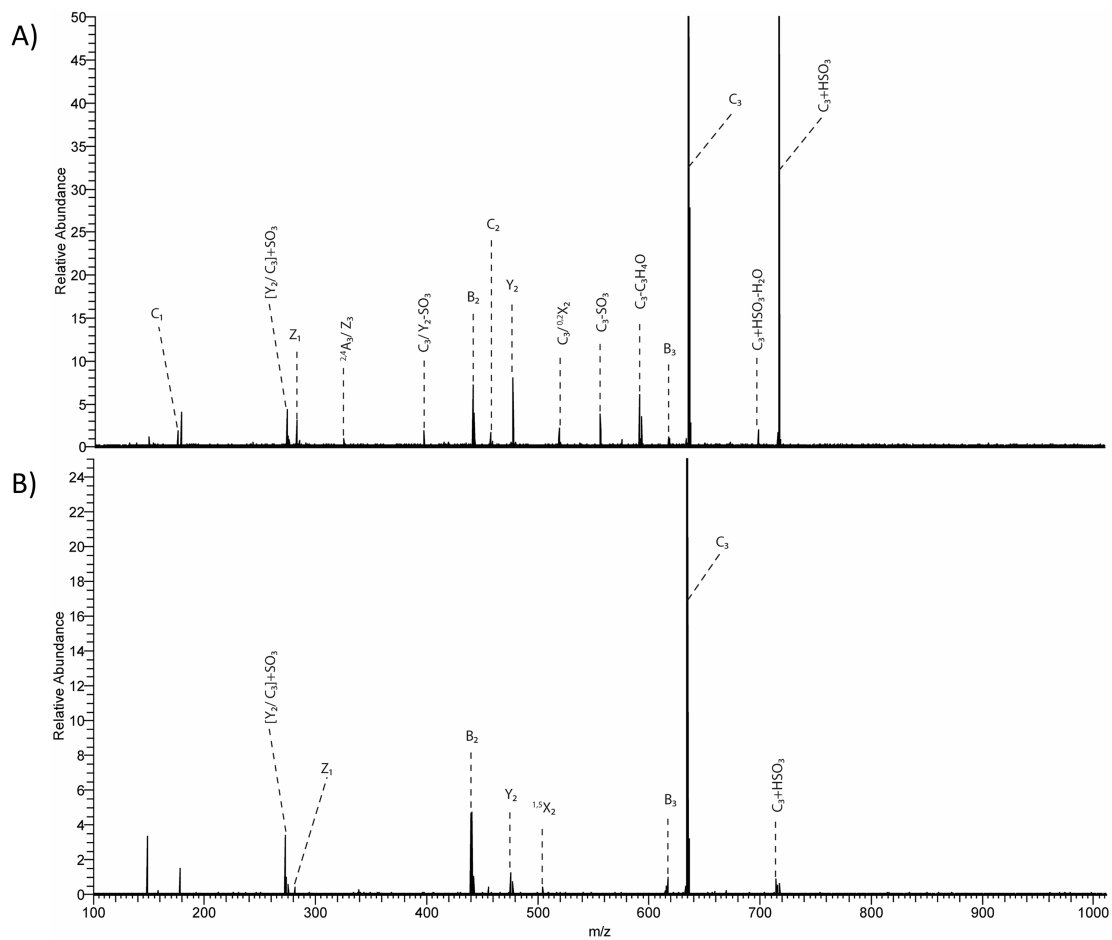

Figure S8. MS<sup>3</sup> activation of the fragment ion m/z 715.05 of CS-A dp4 using (A) 193 nm UVPD (8 pulses, 4 mJ)/ 193 nm UVPD (8 pulses, 4 mJ) and (B) 193 nm UVPD (8 pulses, 4 mJ)/ HCD (NCE 20). Fragment ion lists are shown in Tables S25 and S26.

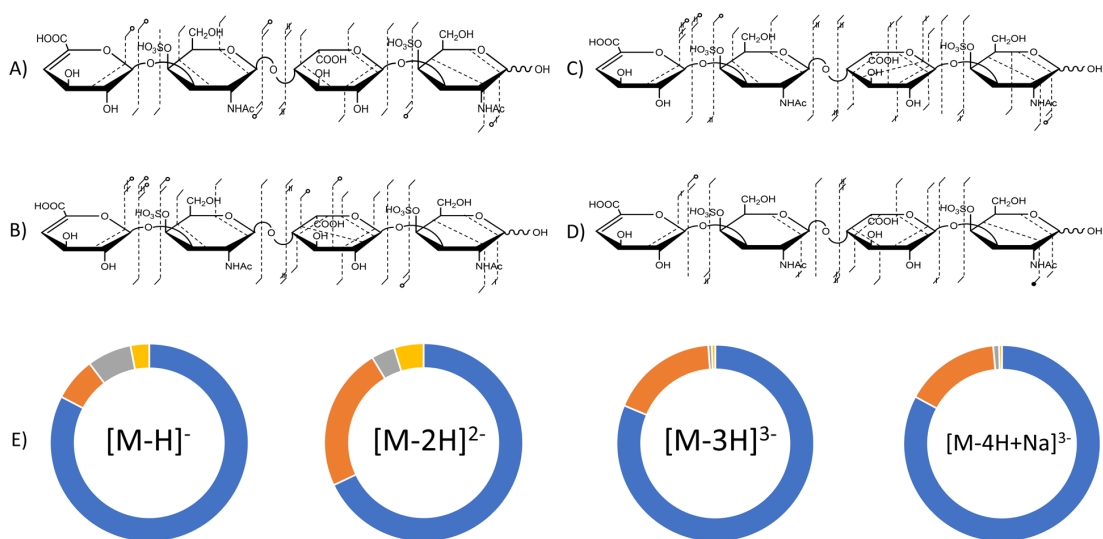

Figure S9. Annotated fragment maps depicting 193 nm UVPD fragment ion diversity using 8 laser pulses (4 mJ per pulse) in the high-pressure cell for (A) DS dp4  $[\text{M}-\text{H}]^-$  precursor, (B) DS dp4  $[\text{M}-2\text{H}]^{2-}$  precursor, (C) DS dp4  $[\text{M}-3\text{H}]^{3-}$  precursor and (D) DS dp4  $[\text{M}-4\text{H}+\text{Na}]^{3-}$  precursor. (E) Donut plots depicting the intensity distribution of glycosidic fragments (blue), cross-ring fragments (orange), glycosidic fragments with  $-\text{SO}_3$  loss (grey) and cross-ring fragments with  $-\text{SO}_3$  loss (yellow) of each precursor.

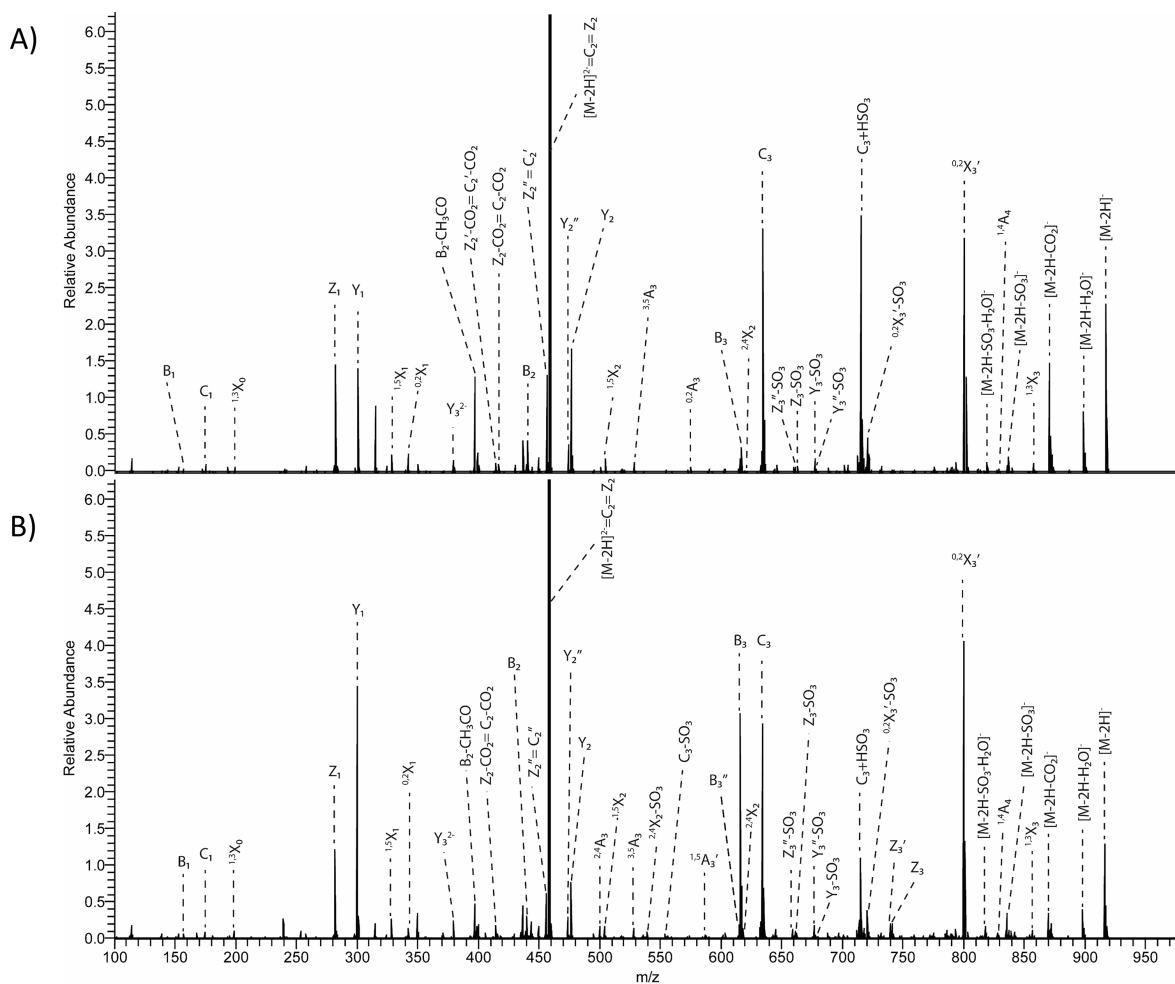

Figure S10. 193 nm UVPD spectra of the  $[M-2H]^{2-}$  precursor ion using 4 laser pulses (4 mJ per pulse) in the high-pressure cell of (A) DS dp4 and (B) CS-A dp4.

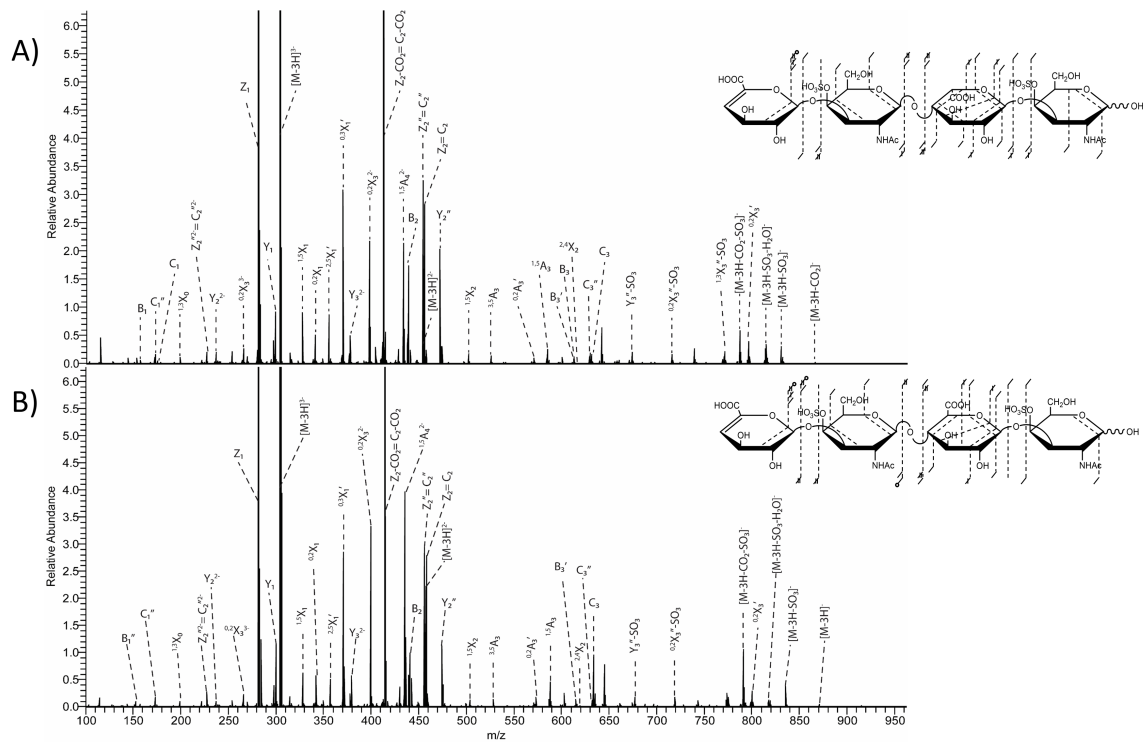

Figure S11. 193 nm UVPD with 4 laser pulses (4 mJ per pulse) in the high-pressure cell spectra and annotated fragment map insets of (A) DS dp4 and (B) CS-A dp4 using the  $[M-3H]^{3-}$  precursor ion.

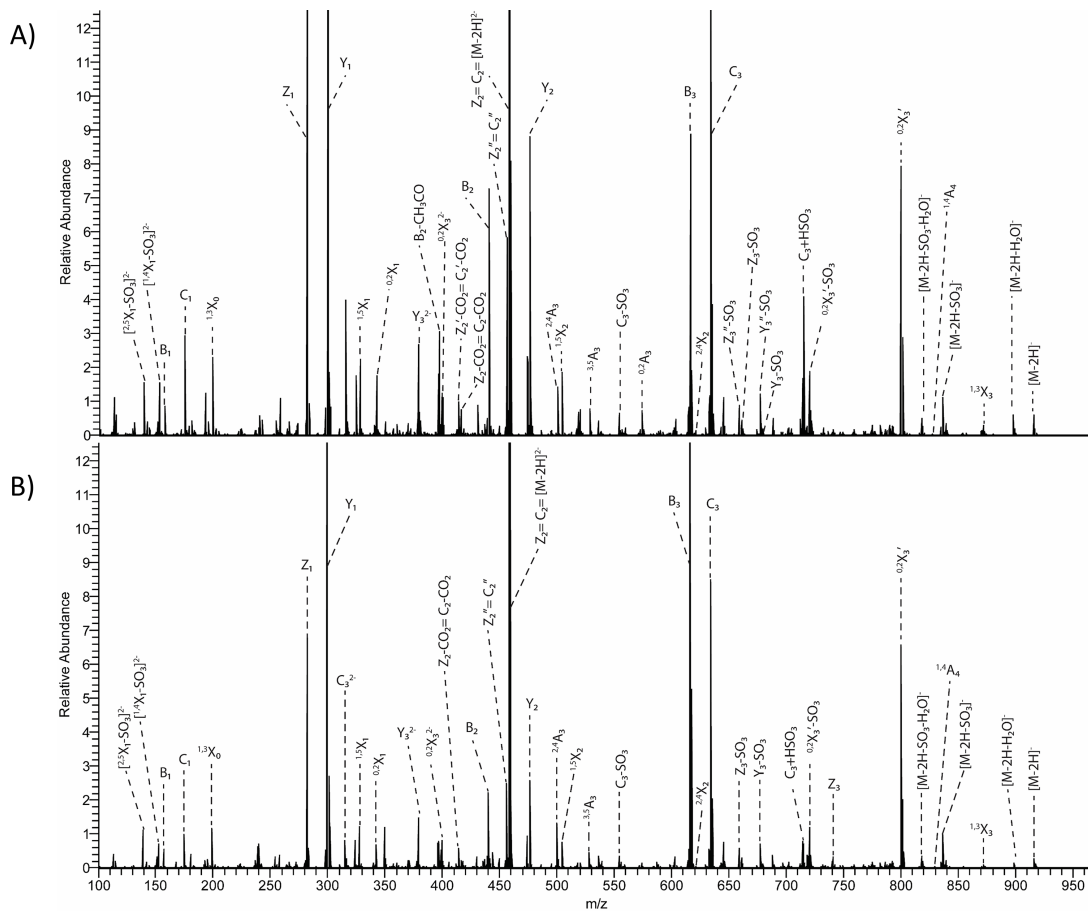

Figure S12. 193 nm UVPD spectra of the  $[M-2H]^{2-}$  precursor ion using 8 laser pulses (4 mJ per pulse) in the low-pressure cell of (A) DS dp4 and (B) CS-A dp4.

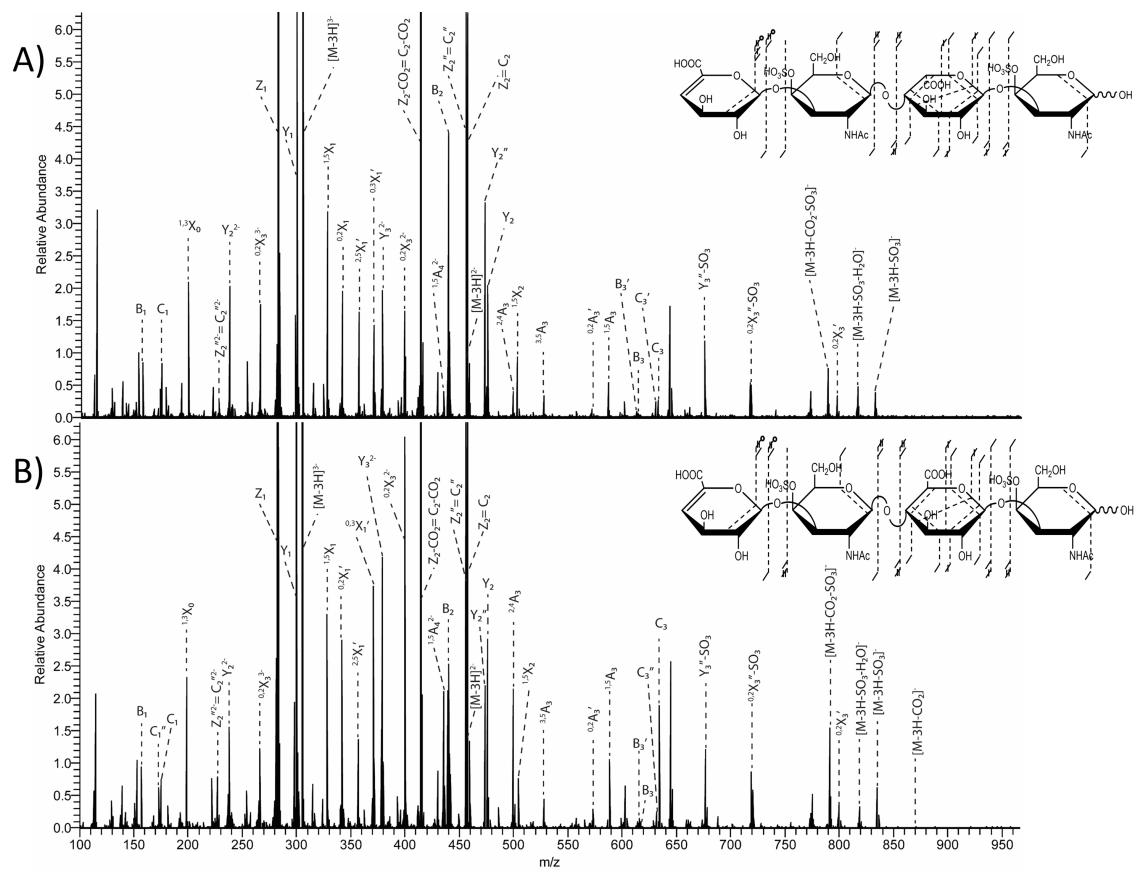

Figure S13. 193 nm UVPD using 8 laser pulses (4 mJ per pulse) in the low-pressure cell spectra and fragment map insets of the [M-3H]<sup>3-</sup> precursor of (A) DS dp4 and (B) CS- A dp4.

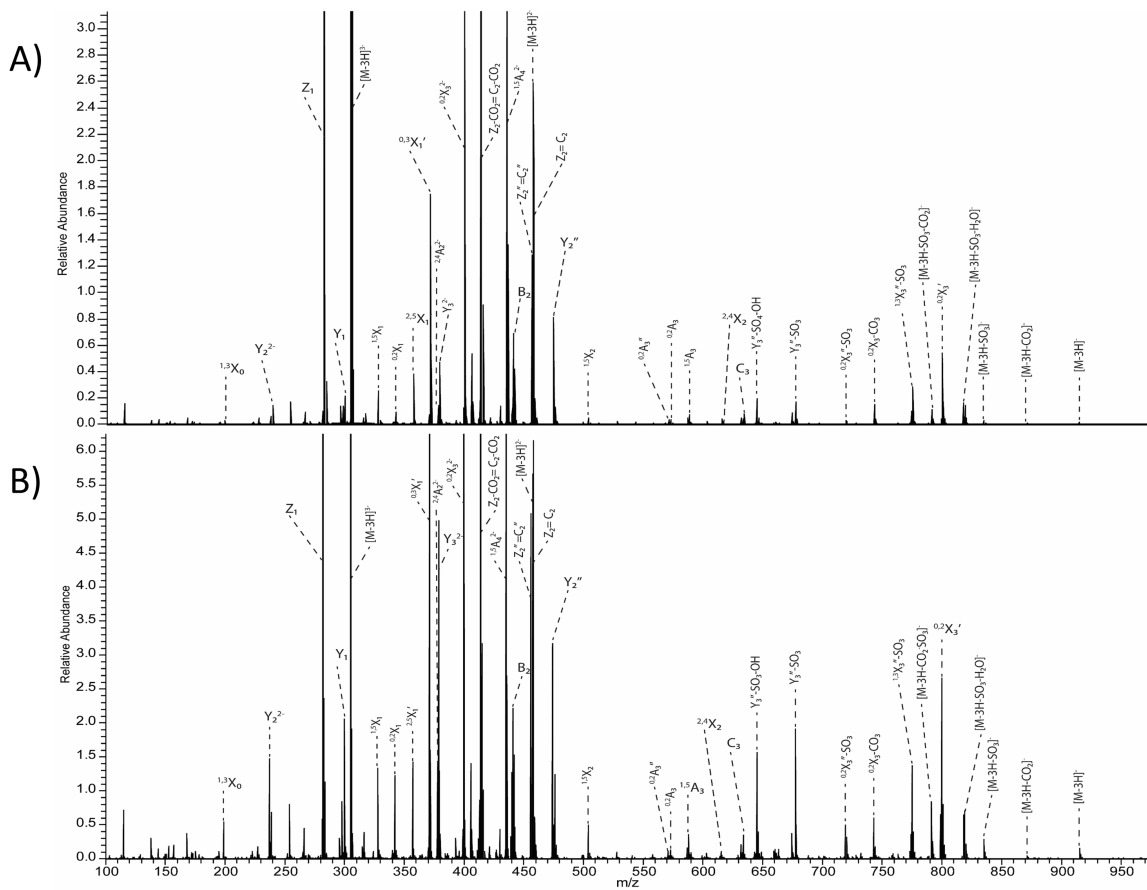

Figure S14. 213 nm UVPD spectra of the [M-3H]<sup>3+</sup> precursor ion of DS dp4 using 750 laser pulses (3  $\mu$ J/ pulse) in the (A) low-pressure cell and (B) high-pressure cell.



## Table of Contents

| Content                                                                                                                                | Table Number |
|----------------------------------------------------------------------------------------------------------------------------------------|--------------|
| 193 nm UVPD activation of the [M-H] <sup>-</sup> precursor of CS-A dp4 (8 pulses, 4 mJ)                                                | S1           |
| 193 nm UVPD activation of the [M-H] <sup>-</sup> precursor of DS dp4 (8 pulses, 4 mJ)                                                  | S2           |
| 193 nm UVPD activation of the [M-2H] <sup>2-</sup> precursor of DS dp4 in the high-pressure cell (8 pulses, 4 mJ)                      | S3           |
| 193 nm UVPD activation of the [M-2H] <sup>2-</sup> precursor of DS dp4 in the low-pressure cell (8 pulses, 4 mJ)                       | S4           |
| 193 nm UVPD activation of the [M-2H] <sup>2-</sup> precursor of DS dp4 in the high-pressure cell (4 pulses, 4 mJ)                      | S5           |
| 193 nm UVPD activation of the [M-2H] <sup>2-</sup> precursor of CS-A dp4 in the high-pressure cell (8 pulses, 4 mJ)                    | S6           |
| 193 nm UVPD activation of the [M-2H] <sup>2-</sup> precursor of CS-A dp4 in the low-pressure cell (8 pulses, 4 mJ)                     | S7           |
| 193 nm UVPD activation of the [M-2H] <sup>2-</sup> precursor of CS-A dp4 in the high-pressure cell (4 pulses, 4 mJ)                    | S8           |
| 193 nm UVPD activation of the [M-3H] <sup>3-</sup> precursor of DS dp4 in the high-pressure cell (8 pulses, 4 mJ)                      | S9           |
| 193 nm UVPD activation of the [M-3H] <sup>3-</sup> precursor of DS dp4 in the low-pressure cell (8 pulses, 4 mJ)                       | S10          |
| 193 nm UVPD activation of the [M-3H] <sup>3-</sup> precursor of DS dp4 in the high-pressure cell (4 pulses, 4 mJ)                      | S11          |
| 193 nm UVPD activation of the [M-3H] <sup>3-</sup> precursor of CS-A dp4 in the high-pressure cell (8 pulses, 4 mJ)                    | S12          |
| 193 nm UVPD activation of the [M-3H] <sup>3-</sup> precursor of CS-A dp4 in the low-pressure cell (8 pulses, 4 mJ)                     | S13          |
| 193 nm UVPD activation of the [M-3H] <sup>3-</sup> precursor of CS-A dp4 in the high-pressure cell (4 pulses, 4 mJ)                    | S14          |
| 193 nm UVPD activation of the [M-4H+Na] <sup>3-</sup> precursor of CS-A dp4 in the high-pressure cell (8 pulses, 4 mJ)                 | S15          |
| 193 nm UVPD activation of the [M-4H+Na] <sup>3-</sup> precursor of DS dp4 in the high-pressure cell (8 pulses, 4 mJ)                   | S16          |
| 213 nm UVPD activation of the [M-3H] <sup>3-</sup> precursor of DS dp4 in the high-pressure cell (50 ms)                               | S17          |
| 213 nm UVPD activation of the [M-3H] <sup>3-</sup> precursor of DS dp4 in the low-pressure cell (50 ms)                                | S18          |
| 213 nm UVPD activation of the [M-3H] <sup>3-</sup> precursor of DS dp4 in the high-pressure cell (150 ms)                              | S19          |
| 213 nm UVPD activation of the [M-3H] <sup>3-</sup> precursor of DS dp4 in the high-pressure cell (300 ms)                              | S20          |
| 213 nm UVPD activation of the [M-3H] <sup>3-</sup> precursor of DS dp4 in the high-pressure cell (400 ms)                              | S21          |
| 213 nm UVPD activation of the [M-3H] <sup>3-</sup> precursor of DS dp4 in the low-pressure cell (400 ms)                               | S22          |
| MS <sup>3</sup> activation of the fragment ion m/z 715.05 of DS dp4 using 193 nm UVPD (8 pulses, 4 mJ)/ 193 nm UVPD (8 pulses, 4 mJ)   | S23          |
| MS <sup>3</sup> activation of the fragment ion m/z 715.05 of DS dp4 using 193 nm UVPD (8 pulses, 4 mJ)/ HCD (NCE 20)                   | S24          |
| MS <sup>3</sup> activation of the fragment ion m/z 715.05 of CS-A dp4 using 193 nm UVPD (8 pulses, 4 mJ)/ 193 nm UVPD (8 pulses, 4 mJ) | S25          |
| MS <sup>3</sup> activation of the fragment ion m/z 715.05 of CS-A dp4 using 193 nm UVPD (8 pulses, 4 mJ)/ HCD (NCE 20)                 | S26          |

Table S1: Fragment ion list for 193 nm UVPD activation of the [M-H]<sup>-</sup> precursor of CS-A dp4 (8 pulses, 4 mJ).

| Measured m/z | Calculated m/z | Accuracy (PPM) | Intensity | Assigned Fragment                                    |
|--------------|----------------|----------------|-----------|------------------------------------------------------|
| 157.0144     | 157.0142       | 0.97           | 4754.8    | B <sub>1</sub>                                       |
| 175.025      | 175.0248       | 1.1            | 27347.4   | C <sub>1</sub>                                       |
| 198.9921     | 198.9917       | 1.5            | 6025.7    | <sup>1,3</sup> X <sub>0</sub>                        |
| 282.0293     | 282.0289       | 1.4            | 63313.8   | Z <sub>1</sub>                                       |
| 300.0399     | 300.0394       | 1.4            | 83608.1   | Y <sub>1</sub>                                       |
| 328.0348     | 328.0343       | 1.2            | 16121.5   | <sup>1,5</sup> X <sub>1</sub>                        |
| 360.0941     | 360.0936       | 1.3            | 4561.8    | B <sub>2</sub> -SO <sub>3</sub>                      |
| 396.1153     | 396.1147       | 1.4            | 8744.8    | Y <sub>2</sub> -SO <sub>3</sub>                      |
| 416.051      | 416.0504       | 1.4            | 10277.6   | <sup>2,4</sup> X <sub>1</sub>                        |
| 440.051      | 440.0504       | 1.3            | 206886.1  | B <sub>2</sub>                                       |
| 456.0459     | 456.0458       | 0              | 29959.4   | Z <sub>2</sub> "                                     |
| 456.0459     | 456.0458       | 0              | 29959.4   | C <sub>2</sub> "                                     |
| 458.0616     | 458.0609       | 1.3            | 33634.5   | Z <sub>2</sub>                                       |
| 458.0616     | 458.0609       | 1.3            | 33634.5   | C <sub>2</sub>                                       |
| 476.0721     | 476.0715       | 1.1            | 145963.3  | Y <sub>2</sub>                                       |
| 504.0672     | 504.0664       | 1.4            | 12921.9   | <sup>1,5</sup> X <sub>2</sub>                        |
| 554.137      | 554.1362       | 1.3            | 17647.9   | C <sub>3</sub> -SO <sub>3</sub>                      |
| 599.195      | 599.1941       | 1.5            | 6341.5    | Y <sub>3</sub> -2SO <sub>3</sub>                     |
| 616.0833     | 616.0825       | 1.3            | 10504     | B <sub>3</sub>                                       |
| 619.1306     | 619.1298       | 1.3            | 6574.7    | <sup>2,4</sup> X <sub>2</sub>                        |
| 634.0939     | 634.0930       | 1.3            | 45667.9   | C <sub>3</sub> -SO <sub>3</sub>                      |
| 659.1258     | 659.1253       | 0.65           | 7025.5    | Z <sub>3</sub> "-SO <sub>3</sub>                     |
| 661.1414     | 661.1403       | 1.6            | 4845.1    | Z <sub>3</sub> -SO <sub>3</sub>                      |
| 679.152      | 679.1509       | 1.6            | 15239.8   | Y <sub>3</sub> -SO <sub>3</sub>                      |
| 715.059      | 715.0564       | 3.6            | 11169.5   | C <sub>3</sub> +HSO <sub>3</sub>                     |
| 721.1627     | 721.1615       | 1.7            | 17917.1   | <sup>0,2</sup> X <sub>3</sub> -SO <sub>3</sub>       |
| 757.2169     | 757.2156       | 1.7            | 29523.8   | [M-H-2SO <sub>3</sub> ] <sup>-</sup>                 |
| 793.1836     | 793.1832       | 0.5            | 2483.7    | [M-H-SO <sub>3</sub> -CO <sub>2</sub> ] <sup>-</sup> |
| 819.1631     | 819.1624       | 0.78           | 61997.5   | [M-H-SO <sub>3</sub> -H <sub>2</sub> O] <sup>-</sup> |
| 827.0969     | 827.0975       | -0.82          | 187.8     | <sup>1,4</sup> A <sub>4</sub>                        |
| 837.1736     | 837.1724       | 1.4            | 1448867.4 | [M-H-SO <sub>3</sub> ] <sup>-</sup>                  |
| 873.1342     | 873.1399       | -6.6           | 1528      | [M-H-CO <sub>2</sub> ] <sup>-</sup>                  |
| 899.1179     | 899.1192       | -1.5           | 1730.4    | [M-H-H <sub>2</sub> O] <sup>-</sup>                  |
| 917.1305     | 917.1292       | 1.3            | 872408.2  | [M-H] <sup>-</sup>                                   |

Table S2: Fragment ion list for 193 nm UVPD activation of the [M-H]<sup>-</sup> precursor of DS dp4 (8 pulses, 4 mJ).

| Measured m/z | Calculated m/z | Accuracy (PPM) | Intensity | Assigned Fragment                                    |
|--------------|----------------|----------------|-----------|------------------------------------------------------|
| 157.0139     | 157.0142       | -2.2           | 1766.1    | B <sub>1</sub>                                       |
| 175.0246     | 175.0248       | -1.2           | 13065.1   | C <sub>1</sub>                                       |
| 198.9913     | 198.9917       | -2.5           | 1559.4    | <sup>1,3</sup> X <sub>0</sub>                        |
| 282.0282     | 282.0289       | -2.5           | 26137.3   | Z <sub>1</sub>                                       |
| 300.0388     | 300.0394       | -2.3           | 19226.8   | Y <sub>1</sub>                                       |
| 328.0339     | 328.0343       | -1.5           | 3473.2    | <sup>1,5</sup> X <sub>1</sub>                        |
| 360.0932     | 360.0936       | -1.2           | 1391.2    | B <sub>2</sub> -SO <sub>3</sub>                      |
| 396.1143     | 396.1147       | -1.1           | 3578.2    | Y <sub>2</sub> -SO <sub>3</sub>                      |
| 416.0499     | 416.0504       | -1.3           | 3842.2    | <sup>2,4</sup> X <sub>1</sub>                        |
| 440.0498     | 440.0504       | -1.4           | 48973.7   | B <sub>2</sub>                                       |
| 456.0447     | 456.0458       | -2.6           | 14909.7   | Z <sub>2</sub> "                                     |
| 456.0447     | 456.0458       | -2.6           | 14909.7   | C <sub>2</sub> "                                     |
| 458.0604     | 458.0609       | -1.3           | 6574.3    | Z <sub>2</sub>                                       |
| 458.0604     | 458.0609       | -1.3           | 6574.3    | C <sub>2</sub>                                       |
| 476.0708     | 476.0715       | -1.6           | 40616.8   | Y <sub>2</sub>                                       |
| 504.0657     | 504.0664       | -1.5           | 7956.5    | <sup>1,5</sup> X <sub>2</sub>                        |
| 554.1354     | 554.1362       | -1.6           | 6185.4    | C <sub>3</sub> -SO <sub>3</sub>                      |
| 574.0715     | 574.0719       | -0.79          | 424.7     | <sup>0,2</sup> A <sub>3</sub>                        |
| 616.0817     | 616.0825       | -1.3           | 3080.5    | B <sub>3</sub>                                       |
| 619.129      | 619.1298       | -1.3           | 2409.7    | <sup>2,4</sup> X <sub>2</sub>                        |
| 634.092      | 634.0930       | -1.7           | 20116.8   | C <sub>3</sub>                                       |
| 679.15       | 679.1509       | -1.4           | 4901      | Y <sub>3</sub> -SO <sub>3</sub>                      |
| 715.0565     | 715.0564       | 0.13           | 6828.5    | C <sub>3</sub> +HSO <sub>3</sub>                     |
| 721.1603     | 721.1615       | -1.7           | 4935.5    | <sup>0,2</sup> X <sub>3</sub> -SO <sub>3</sub>       |
| 757.2144     | 757.2156       | -1.6           | 3623.9    | [M-H-2SO <sub>3</sub> ] <sup>-</sup>                 |
| 793.1798     | 793.1832       | -4.3           | 6211.2    | [M-H-SO <sub>3</sub> -CO <sub>2</sub> ] <sup>-</sup> |
| 819.1605     | 819.1624       | -2.4           | 18817     | [M-H-SO <sub>3</sub> -H <sub>2</sub> O] <sup>-</sup> |
| 828.1042     | 828.1049       | -0.84          | 397       | <sup>1,4</sup> A <sub>4</sub>                        |
| 837.1713     | 837.1724       | -1.4           | 475284.8  | [M-H-SO <sub>3</sub> ] <sup>-</sup>                  |
| 873.1326     | 873.1399       | -8.5           | 9581.9    | [M-H-CO <sub>2</sub> ] <sup>-</sup>                  |
| 899.1152     | 899.1192       | -4.5           | 1583.4    | [M-H-H <sub>2</sub> O] <sup>-</sup>                  |
| 917.1278     | 917.1292       | -1.6           | 216655.7  | [M-H] <sup>-</sup>                                   |

Table S3: Fragment ion list for 193 nm UVPD activation of the  $[M-2H]^{2-}$  precursor of DS dp4 in the high-pressure cell (8 pulses, 4 mJ).

| Measured m/z | Calculated m/z | Accuracy (PPM) | Intensity | Assigned Fragment                               |
|--------------|----------------|----------------|-----------|-------------------------------------------------|
| 157.0142     | 157.0142       | -0.29          | 386771    | B <sub>1</sub>                                  |
| 175.0247     | 175.0248       | -0.63          | 660087.6  | C <sub>1</sub>                                  |
| 198.9917     | 198.9917       | -0.48          | 950130.3  | <sup>1,3</sup> X <sub>0</sub>                   |
| 282.0289     | 282.0289       | -0.03          | 7631718.5 | Z <sub>1</sub>                                  |
| 300.0394     | 300.0394       | -0.25          | 1.80E+07  | Y <sub>1</sub>                                  |
| 328.0343     | 328.0343       | -0.27          | 1600171.8 | <sup>1,5</sup> X <sub>1</sub>                   |
| 342.05       | 342.0500       | -0.11          | 833672    | <sup>0,2</sup> X <sub>1</sub>                   |
| 379.0501     | 379.0502       | -0.36          | 1109182.6 | Y <sub>3</sub> <sup>2-</sup>                    |
| 414.071      | 414.0717       | -1.7           | 939309.6  | Z <sub>2</sub> -CO <sub>2</sub>                 |
| 414.071      | 414.0717       | -1.7           | 939309.6  | C <sub>2</sub> -CO <sub>2</sub>                 |
| 440.0505     | 440.0504       | 0.15           | 2134325.8 | B <sub>2</sub>                                  |
| 456.0463     | 456.0459       | 0.67           | 3582480   | Z <sub>2</sub> "                                |
| 456.0463     | 456.0459       | 0.67           | 3582480   | C <sub>2</sub> "                                |
| 458.0615     | 458.0609       | 1.1            | 2.47E+08  | Z <sub>2</sub>                                  |
| 458.0615     | 458.0609       | 1.1            | 2.47E+08  | $[M-2H]^{2-}$                                   |
| 458.0615     | 458.0609       | 1.1            | 2.47E+08  | C <sub>2</sub>                                  |
| 476.0714     | 476.0715       | -0.34          | 4630654.5 | Y <sub>2</sub>                                  |
| 500.0718     | 500.0715       | 0.47           | 1065457.4 | <sup>2,4</sup> A <sub>3</sub>                   |
| 504.0664     | 504.0664       | -0.15          | 1073665.1 | <sup>1,5</sup> X <sub>2</sub>                   |
| 528.0667     | 528.0664       | 0.42           | 894172.8  | <sup>3,5</sup> A <sub>3</sub>                   |
| 554.1364     | 554.1362       | 0.23           | 701168.8  | C <sub>3</sub> -SO <sub>3</sub>                 |
| 616.0828     | 616.0825       | 0.45           | 1.56E+07  | B <sub>3</sub>                                  |
| 619.1304     | 619.1298       | 0.95           | 102350.4  | <sup>2,4</sup> X <sub>2</sub>                   |
| 634.0933     | 634.0930       | 0.33           | 1.71E+07  | C <sub>3</sub>                                  |
| 659.125      | 659.1253       | -0.56          | 7.65E+05  | Z <sub>3</sub> "-SO <sub>3</sub>                |
| 661.1411     | 661.1403       | 1.1            | 715256    | Z <sub>3</sub> -SO <sub>3</sub>                 |
| 677.1356     | 677.1359       | -0.49          | 1.75E+06  | Y <sub>3</sub> "-SO <sub>3</sub>                |
| 679.1539     | 679.1509       | 4.4            | 169428.4  | Y <sub>3</sub> -SO <sub>3</sub>                 |
| 715.0581     | 715.0563       | 2.4            | 5721797   | C <sub>3</sub> +HSO <sub>3</sub>                |
| 720.154      | 720.1545       | -0.69          | 4002868.8 | <sup>0,2</sup> X <sub>3</sub> '-SO <sub>3</sub> |
| 740.0898     | 740.0901       | -0.4           | 1088177.6 | Z <sub>3</sub> '                                |
| 741.0971     | 741.0971       | -0.11          | 1063499.8 | Z <sub>3</sub>                                  |
| 801.1146     | 801.1183       | -4.6           | 6340332   | <sup>0,2</sup> X <sub>3</sub> '                 |
| 818.1544     | 818.1554       | -1.3           | 876701.9  | $[M-2H-SO_3-H_2O]^-$                            |
| 827.0975     | 827.0975       | -0.09          | 99521.7   | <sup>1,4</sup> A <sub>4</sub>                   |
| 836.1647     | 836.1654       | -0.83          | 2034560.1 | $[M-2H-SO_3]^-$                                 |
| 857.108      | 857.1081       | -0.16          | 516611.3  | <sup>1,3</sup> X <sub>3</sub>                   |
| 872.1333     | 872.1332       | 0.03           | 898920.7  | $[M-2H-CO_2]^-$                                 |
| 898.1113     | 898.1122       | -1.1           | 2054511.9 | $[M-2H-H_2O]^-$                                 |
| 916.1216     | 916.1222       | -0.73          | 6796009   | $[M-2H]^-$                                      |

Table S4: Fragment ion list for 193 nm UVPD activation of the  $[M-2H]^{2-}$  precursor of DS dp4 in the low-pressure cell (8 pulses, 4 mJ).

| Measured m/z | Calculated m/z | Accuracy (PPM) | Intensity | Assigned Fragment                                           |
|--------------|----------------|----------------|-----------|-------------------------------------------------------------|
| 157.0141     | 157.0142       | -0.93          | 17872.5   | B <sub>1</sub>                                              |
| 175.0248     | 175.0248       | -0.06          | 58180.2   | C <sub>1</sub>                                              |
| 198.9917     | 198.9917       | -0.48          | 45844.3   | <sup>1,3</sup> X <sub>0</sub>                               |
| 282.0285     | 282.0289       | -1.5           | 339557.2  | Z <sub>1</sub>                                              |
| 300.0391     | 300.0394       | -1.3           | 704381.8  | Y <sub>1</sub>                                              |
| 328.0342     | 328.0343       | -0.57          | 44679.4   | <sup>1,5</sup> X <sub>1</sub>                               |
| 342.05       | 342.0500       | -0.11          | 35065     | <sup>0,2</sup> X <sub>1</sub>                               |
| 379.05       | 379.0502       | -0.62          | 54292.4   | Y <sub>3</sub> <sup>2-</sup>                                |
| 397.0319     | 397.0315       | 1              | 60756.7   | B <sub>2</sub> -CH <sub>3</sub> CO                          |
| 400.0556     | 400.0555       | 0.2            | 22921.3   | <sup>0,2</sup> X <sub>3</sub> <sup>2-</sup>                 |
| 413.0633     | 413.0647       | -3.4           | 3320.1    | Z <sub>2</sub> <sup>1</sup> -CO <sub>2</sub>                |
| 413.0633     | 413.0647       | -3.4           | 3320.1    | C <sub>2</sub> <sup>1</sup> -CO <sub>2</sub>                |
| 414.071      | 414.0717       | -1.7           | 19815.1   | Z <sub>2</sub> -CO <sub>2</sub>                             |
| 414.071      | 414.0717       | -1.7           | 19815.1   | C <sub>2</sub> -CO <sub>2</sub>                             |
| 440.0502     | 440.0504       | -0.53          | 148273.9  | B <sub>2</sub>                                              |
| 456.0453     | 456.0459       | -1.5           | 117860    | Z <sub>2</sub> <sup>''</sup>                                |
| 456.0453     | 456.0459       | -1.5           | 117860    | C <sub>2</sub> <sup>''</sup>                                |
| 458.0608     | 458.0609       | -0.43          | 2006954.3 | Z <sub>2</sub>                                              |
| 458.0608     | 458.0609       | -0.43          | 2006954.3 | $[M-2H]^{2-}$                                               |
| 458.0608     | 458.0609       | -0.43          | 2006954.3 | C <sub>2</sub>                                              |
| 476.0712     | 476.0715       | -0.76          | 177077.2  | Y <sub>2</sub>                                              |
| 500.0713     | 500.0715       | -0.52          | 29257.2   | <sup>2,4</sup> A <sub>3</sub>                               |
| 504.0662     | 504.0664       | -0.55          | 37637.9   | <sup>1,5</sup> X <sub>2</sub>                               |
| 554.1359     | 554.1362       | -0.67          | 13126.2   | C <sub>3</sub> -SO <sub>3</sub>                             |
| 574.0715     | 574.0719       | -0.79          | 15225.3   | <sup>0,2</sup> A <sub>3</sub>                               |
| 616.082      | 616.0825       | -0.84          | 182301.3  | B <sub>3</sub>                                              |
| 619.1295     | 619.1298       | -0.49          | 1388.3    | <sup>2,4</sup> X <sub>2</sub>                               |
| 634.0926     | 634.0930       | -0.76          | 359430.4  | C <sub>3</sub>                                              |
| 659.1243     | 659.1253       | -1.6           | 17811.9   | Z <sub>3</sub> <sup>''</sup> -SO <sub>3</sub>               |
| 661.1404     | 661.1403       | 0.04           | 9227.2    | Z <sub>3</sub> -SO <sub>3</sub>                             |
| 677.1348     | 677.1359       | -1.7           | 24949.8   | Y <sub>3</sub> <sup>''</sup> -SO <sub>3</sub>               |
| 679.152      | 679.1509       | 1.6            | 3678.1    | Y <sub>3</sub> -SO <sub>3</sub>                             |
| 715.0571     | 715.0563       | 1              | 81697     | C <sub>3</sub> +HSO <sub>3</sub>                            |
| 720.153      | 720.1545       | -2.1           | 37093.3   | <sup>0,2</sup> X <sub>3</sub> <sup>1</sup> -SO <sub>3</sub> |
| 800.11       | 800.1113       | -1.6           | 166729.6  | <sup>0,2</sup> X <sub>3</sub> <sup>1</sup>                  |
| 818.1535     | 818.1554       | -2.4           | 9743.9    | $[M-2H-SO_3-H_2O]^-$                                        |
| 827.0982     | 827.0975       | 0.75           | 693.7     | <sup>1,4</sup> A <sub>4</sub>                               |
| 836.1641     | 836.1654       | -1.6           | 23056.5   | $[M-2H-SO_3]^-$                                             |
| 857.1071     | 857.1081       | -1.2           | 1212.1    | <sup>1,3</sup> X <sub>3</sub>                               |
| 898.1103     | 898.1122       | -2.2           | 11987.5   | $[M-2H-H_2O]^-$                                             |
| 916.1208     | 916.1222       | -1.6           | 11957     | $[M-2H]^-$                                                  |

Table S5: Fragment ion list for 193 nm UVPD activation of the  $[M-2H]^{2-}$  precursor of DS dp4 in the high-pressure cell (4 pulses, 4 mJ).

| Measured m/z | Calculated m/z | Accuracy (PPM) | Intensity | Assigned Fragment                                           |
|--------------|----------------|----------------|-----------|-------------------------------------------------------------|
| 157.014      | 157.0142       | -1.6           | 6953.8    | B <sub>1</sub>                                              |
| 175.0249     | 175.0248       | 0.5            | 16848.2   | C <sub>1</sub>                                              |
| 198.9918     | 198.9917       | 0.01           | 10000     | <sup>1,3</sup> X <sub>0</sub>                               |
| 282.0286     | 282.0289       | -1.1           | 199780    | Z <sub>1</sub>                                              |
| 300.0392     | 300.0394       | -0.91          | 189802.1  | Y <sub>1</sub>                                              |
| 328.0343     | 328.0343       | -0.27          | 31623.4   | <sup>1,5</sup> X <sub>1</sub>                               |
| 342.0501     | 342.0500       | 0.17           | 34777.3   | <sup>0,2</sup> X <sub>1</sub>                               |
| 379.0503     | 379.0502       | 0.16           | 22734.6   | Y <sub>3</sub> <sup>2-</sup>                                |
| 397.032      | 397.0315       | 1.3            | 170944.9  | B <sub>2</sub> -CH <sub>3</sub> CO                          |
| 413.0632     | 413.0647       | -3.6           | 3858.2    | Z <sub>2</sub> <sup>1</sup> -CO <sub>2</sub>                |
| 413.0632     | 413.0647       | -3.6           | 3858.2    | C <sub>2</sub> <sup>1</sup> -CO <sub>2</sub>                |
| 414.0709     | 414.0717       | -2             | 17390.1   | Z <sub>2</sub> -CO <sub>2</sub>                             |
| 414.0709     | 414.0717       | -2             | 17390.1   | C <sub>2</sub> -CO <sub>2</sub>                             |
| 440.0505     | 440.0504       | 0.15           | 60421.8   | B <sub>2</sub>                                              |
| 456.0465     | 456.0459       | 1.1            | 172432.4  | Z <sub>2</sub> <sup>''</sup>                                |
| 456.0465     | 456.0459       | 1.1            | 172432.4  | C <sub>2</sub> <sup>''</sup>                                |
| 458.0617     | 458.0609       | 1.5            | 1.28E+07  | Z <sub>2</sub>                                              |
| 458.0617     | 458.0609       | 1.5            | 1.28E+07  | $[M-2H]^{2-}$                                               |
| 458.0617     | 458.0609       | 1.5            | 1.28E+07  | C <sub>2</sub>                                              |
| 474.0558     | 474.0566       | -1.7           | 5.23E+04  | Y <sub>2</sub> <sup>''</sup>                                |
| 476.0714     | 476.0715       | -0.34          | 218874.9  | Y <sub>2</sub>                                              |
| 504.0662     | 504.0664       | -0.55          | 26911.2   | <sup>1,5</sup> X <sub>2</sub>                               |
| 528.0667     | 528.0664       | 0.42           | 19263.5   | <sup>3,5</sup> A <sub>3</sub>                               |
| 574.0716     | 574.0719       | -0.62          | 11317.6   | <sup>0,2</sup> A <sub>3</sub>                               |
| 616.0824     | 616.0825       | -0.19          | 47829.5   | B <sub>3</sub>                                              |
| 619.1302     | 619.1298       | 0.63           | 3900.4    | <sup>2,4</sup> X <sub>2</sub>                               |
| 634.093      | 634.0930       | -0.13          | 441769.4  | C <sub>3</sub>                                              |
| 659.1245     | 659.1253       | -1.3           | 11566     | Z <sub>3</sub> <sup>''</sup> -SO <sub>3</sub>               |
| 661.1411     | 661.1403       | 1.1            | 10554.9   | Z <sub>3</sub> -SO <sub>3</sub>                             |
| 677.1351     | 677.1359       | -1.2           | 26784.8   | Y <sub>3</sub> <sup>''</sup> -SO <sub>3</sub>               |
| 679.1534     | 679.1509       | 3.6            | 2733.1    | Y <sub>3</sub> -SO <sub>3</sub>                             |
| 715.0577     | 715.0563       | 1.9            | 448555.6  | C <sub>3</sub> +HSO <sub>3</sub>                            |
| 720.1536     | 720.1545       | -1.2           | 62417     | <sup>0,2</sup> X <sub>3</sub> <sup>1</sup> -SO <sub>3</sub> |
| 800.1106     | 800.1113       | -0.87          | 424307    | <sup>0,2</sup> X <sub>3</sub> <sup>1</sup>                  |
| 818.1541     | 818.1554       | -1.7           | 19694.3   | $[M-2H-SO_3-H_2O]^-$                                        |
| 827.098      | 827.0975       | 0.5            | 5531.3    | <sup>1,4</sup> A <sub>4</sub>                               |
| 836.1641     | 836.1654       | -1.6           | 41388.1   | $[M-2H-SO_3]^-$                                             |
| 857.108      | 857.1081       | -0.16          | 17270.3   | <sup>1,3</sup> X <sub>3</sub>                               |
| 872.1346     | 872.1332       | 1.5            | 32983.9   | $[M-2H-CO_2]^-$                                             |
| 898.111      | 898.1122       | -1.4           | 108724    | $[M-2H-H_2O]^-$                                             |
| 916.1217     | 916.1222       | -0.62          | 295978.7  | $[M-2H]^-$                                                  |

Table S6: Fragment ion list for 193 nm UVPD activation of the  $[M-2H]^{2-}$  precursor of CS-A dp4 in the high-pressure cell (8 pulses, 4 mJ).

| Measured m/z | Calculated m/z | Accuracy (PPM) | Intensity | Assigned Fragment                                           |
|--------------|----------------|----------------|-----------|-------------------------------------------------------------|
| 157.0142     | 157.0142       | -0.29          | 386771    | B <sub>1</sub>                                              |
| 175.0247     | 175.0248       | -0.63          | 660087.6  | C <sub>1</sub>                                              |
| 198.9917     | 198.9917       | -0.48          | 950130.3  | <sup>1,3</sup> X <sub>0</sub>                               |
| 282.0289     | 282.0289       | -0.03          | 7631718.5 | Z <sub>1</sub>                                              |
| 300.0394     | 300.0394       | -0.25          | 1.80E+07  | Y <sub>1</sub>                                              |
| 328.0343     | 328.0343       | -0.27          | 1600171.8 | <sup>1,5</sup> X <sub>1</sub>                               |
| 342.05       | 342.0500       | -0.11          | 833672    | <sup>0,2</sup> X <sub>1</sub>                               |
| 379.0501     | 379.0502       | -0.36          | 1109182.6 | Y <sub>3</sub> <sup>2-</sup>                                |
| 414.071      | 414.0717       | -1.7           | 939309.6  | Z <sub>2</sub> -CO <sub>2</sub>                             |
| 414.071      | 414.0717       | -1.7           | 939309.6  | C <sub>2</sub> -CO <sub>2</sub>                             |
| 440.0505     | 440.0504       | 0.15           | 2134325.8 | B <sub>2</sub>                                              |
| 456.0463     | 456.0459       | 0.67           | 3582480   | Z <sub>2</sub> <sup>''</sup>                                |
| 456.0463     | 456.0459       | 0.67           | 3582480   | C <sub>2</sub> <sup>''</sup>                                |
| 458.0615     | 458.0609       | 1.1            | 2.47E+08  | Z <sub>2</sub>                                              |
| 458.0615     | 458.0609       | 1.1            | 2.47E+08  | $[M-2H]^{2-}$                                               |
| 458.0615     | 458.0609       | 1.1            | 2.47E+08  | C <sub>2</sub>                                              |
| 476.0714     | 476.0715       | -0.34          | 4630654.5 | Y <sub>2</sub>                                              |
| 500.0718     | 500.0715       | 0.47           | 1065457.4 | <sup>2,4</sup> A <sub>3</sub>                               |
| 504.0664     | 504.0664       | -0.15          | 1073665.1 | <sup>1,5</sup> X <sub>2</sub>                               |
| 528.0667     | 528.0664       | 0.42           | 894172.8  | <sup>3,5</sup> A <sub>3</sub>                               |
| 554.1364     | 554.1362       | 0.23           | 701168.8  | C <sub>3</sub> -SO <sub>3</sub>                             |
| 616.0828     | 616.0825       | 0.45           | 1.56E+07  | B <sub>3</sub>                                              |
| 619.1304     | 619.1298       | 0.95           | 102350.4  | <sup>2,4</sup> X <sub>2</sub>                               |
| 634.0933     | 634.0930       | 0.33           | 1.71E+07  | C <sub>3</sub>                                              |
| 659.125      | 659.1253       | -0.56          | 7.65E+05  | Z <sub>3</sub> <sup>''</sup> -SO <sub>3</sub>               |
| 661.1411     | 661.1403       | 1.1            | 715256    | Z <sub>3</sub> -SO <sub>3</sub>                             |
| 677.1356     | 677.1359       | -0.49          | 1.75E+06  | Y <sub>3</sub> <sup>''</sup> -SO <sub>3</sub>               |
| 679.1539     | 679.1509       | 4.4            | 169428.4  | Y <sub>3</sub> -SO <sub>3</sub>                             |
| 715.0581     | 715.0563       | 2.4            | 5721797   | C <sub>3</sub> +HSO <sub>3</sub>                            |
| 720.154      | 720.1545       | -0.69          | 4002868.8 | <sup>0,2</sup> X <sub>3</sub> <sup>'</sup> -SO <sub>3</sub> |
| 740.0898     | 740.0901       | -0.4           | 1088177.6 | Z <sub>3</sub> <sup>'</sup>                                 |
| 741.0971     | 741.0971       | -0.11          | 1063499.8 | Z <sub>3</sub>                                              |
| 801.1146     | 801.1183       | -4.6           | 6340332   | <sup>0,2</sup> X <sub>3</sub> <sup>'</sup>                  |
| 818.1544     | 818.1554       | -1.3           | 876701.9  | $[M-2H-SO_3-H_2O]^-$                                        |
| 827.0975     | 827.0975       | -0.09          | 99521.7   | <sup>1,4</sup> A <sub>4</sub>                               |
| 836.1647     | 836.1654       | -0.83          | 2034560.1 | $[M-2H-SO_3]^-$                                             |
| 857.108      | 857.1081       | -0.16          | 516611.3  | <sup>1,3</sup> X <sub>3</sub>                               |
| 872.1333     | 872.1332       | 0.03           | 898920.7  | $[M-2H-CO_2]^-$                                             |
| 898.1113     | 898.1122       | -1.1           | 2054511.9 | $[M-2H-H_2O]^-$                                             |
| 916.1216     | 916.1222       | -0.73          | 6796009   | $[M-2H]^-$                                                  |

Table S7: Fragment ion list for 193 nm UVPD activation of the  $[M-2H]^{2-}$  precursor of CS-A dp4 in the low-pressure cell (8 pulses, 4 mJ).

| Measured m/z | Calculated m/z | Accuracy (PPM) | Intensity | Assigned Fragment                               |
|--------------|----------------|----------------|-----------|-------------------------------------------------|
| 157.0141     | 157.0142       | -0.93          | 667880.4  | B <sub>1</sub>                                  |
| 175.0246     | 175.0248       | -1.2           | 1189419   | C <sub>1</sub>                                  |
| 198.9916     | 198.9917       | -0.98          | 1433519   | <sup>1,3</sup> X <sub>0</sub>                   |
| 282.0287     | 282.0289       | -0.74          | 8009461   | Z <sub>1</sub>                                  |
| 300.0392     | 300.0394       | -0.91          | 3.72E+07  | Y <sub>1</sub>                                  |
| 316.5426     | 316.5429       | -0.96          | 314679.3  | C <sub>3</sub> <sup>2-</sup>                    |
| 328.0341     | 328.0343       | -0.88          | 1437117   | <sup>1,5</sup> X <sub>1</sub>                   |
| 342.0497     | 342.0500       | -0.99          | 801432.8  | <sup>0,2</sup> X <sub>1</sub>                   |
| 379.0499     | 379.0502       | -0.88          | 1757168   | Y <sub>3</sub> <sup>2-</sup>                    |
| 400.0553     | 400.0555       | -0.54          | 970361.3  | <sup>0,2</sup> X <sub>3</sub> <sup>2-</sup>     |
| 414.0708     | 414.0717       | -2.2           | 702227.4  | Z <sub>2</sub> -CO <sub>2</sub>                 |
| 414.0708     | 414.0717       | -2.2           | 702227.4  | C <sub>2</sub> -CO <sub>2</sub>                 |
| 440.0502     | 440.0504       | -0.53          | 2661253   | B <sub>2</sub>                                  |
| 456.0455     | 456.0459       | -1.1           | 2974363   | Z <sub>2</sub> "                                |
| 456.0455     | 456.0459       | -1.1           | 2974363   | C <sub>2</sub> "                                |
| 458.0608     | 458.0609       | -0.43          | 1.23E+08  | Z <sub>2</sub>                                  |
| 458.0608     | 458.0609       | -0.43          | 1.23E+08  | $[M-2H]^{2-}$                                   |
| 458.0608     | 458.0609       | -0.43          | 1.23E+08  | C <sub>2</sub>                                  |
| 476.0711     | 476.0715       | -0.97          | 3012829   | Y <sub>2</sub>                                  |
| 500.0714     | 500.0715       | -0.32          | 1600320   | <sup>2,4</sup> A <sub>3</sub>                   |
| 504.0661     | 504.0664       | -0.74          | 940149.9  | <sup>1,5</sup> X <sub>2</sub>                   |
| 528.0663     | 528.0664       | -0.33          | 530744.2  | <sup>3,5</sup> A <sub>3</sub>                   |
| 554.1359     | 554.1362       | -0.67          | 415093.5  | C <sub>3</sub> -SO <sub>3</sub>                 |
| 616.0823     | 616.0825       | -0.36          | 2.59E+07  | B <sub>3</sub>                                  |
| 619.1299     | 619.1298       | 0.15           | 41896     | <sup>2,4</sup> X <sub>2</sub>                   |
| 634.0928     | 634.0930       | -0.45          | 1.02E+07  | C <sub>3</sub>                                  |
| 661.1408     | 661.1403       | 0.64           | 364385.8  | Z <sub>3</sub> -SO <sub>3</sub>                 |
| 679.1525     | 679.1509       | 2.3            | 141212.1  | Y <sub>3</sub> -SO <sub>3</sub>                 |
| 715.0571     | 715.0563       | 1              | 850519.6  | C <sub>3</sub> +HSO <sub>3</sub>                |
| 720.1534     | 720.1545       | -1.5           | 1401252   | <sup>0,2</sup> X <sub>3</sub> '-SO <sub>3</sub> |
| 741.0969     | 741.0971       | -0.38          | 385652    | Z <sub>3</sub>                                  |
| 801.1146     | 801.1183       | -4.6           | 8021901   | <sup>0,2</sup> X <sub>3</sub> '                 |
| 818.1537     | 818.1554       | -2.1           | 418205.8  | $[M-2H-SO_3-H_2O]^-$                            |
| 828.1041     | 828.1049       | -0.96          | 30484     | <sup>1,4</sup> A <sub>4</sub>                   |
| 836.1643     | 836.1654       | -1.3           | 12194995  | $[M-2H-SO_3]^-$                                 |
| 857.1077     | 857.1081       | -0.51          | 29294.8   | <sup>1,3</sup> X <sub>3</sub>                   |
| 898.1104     | 898.1122       | -2.1           | 189617.8  | $[M-2H-H_2O]^-$                                 |
| 916.121      | 916.1222       | -1.4           | 340443.9  | $[M-2H]^-$                                      |



Table S8: Fragment ion list for 193 nm UVPD activation of the [M-2H]<sup>2-</sup> precursor of CS-A dp4 in the high-pressure cell (4 pulses, 4 mJ).

| Measured m/z | Calculated m/z | Accuracy (PPM) | Intensity | Assigned Fragment                                           |
|--------------|----------------|----------------|-----------|-------------------------------------------------------------|
| 157.0142     | 157.0142       | -0.29          | 230344.6  | B <sub>1</sub>                                              |
| 175.0248     | 175.0248       | -0.06          | 316772.8  | C <sub>1</sub>                                              |
| 198.9918     | 198.9917       | 0.01           | 370501.2  | <sup>1,3</sup> X <sub>0</sub>                               |
| 282.029      | 282.0289       | 0.31           | 4713021.5 | Z <sub>1</sub>                                              |
| 300.0395     | 300.0394       | 0.08           | 1.33E+07  | Y <sub>1</sub>                                              |
| 328.0344     | 328.0343       | 0.03           | 1025935.8 | <sup>1,5</sup> X <sub>1</sub>                               |
| 342.0501     | 342.0500       | 0.17           | 505210.3  | <sup>0,2</sup> X <sub>1</sub>                               |
| 379.0503     | 379.0502       | 0.16           | 937570.5  | Y <sub>3</sub> <sup>2-</sup>                                |
| 414.0711     | 414.0717       | -1.5           | 647141.5  | Z <sub>2</sub> -CO <sub>2</sub>                             |
| 414.0711     | 414.0717       | -1.5           | 647141.5  | C <sub>2</sub> -CO <sub>2</sub>                             |
| 440.0508     | 440.0504       | 0.83           | 1144941.4 | B <sub>2</sub>                                              |
| 456.0469     | 456.0459       | 2              | 2330769.3 | Z <sub>2</sub> <sup>"</sup>                                 |
| 456.0469     | 456.0459       | 2              | 2330769.3 | C <sub>2</sub> <sup>"</sup>                                 |
| 458.0619     | 458.0609       | 2              | 4.08E+08  | Z <sub>2</sub>                                              |
| 458.0619     | 458.0609       | 2              | 4.08E+08  | [M-2H] <sup>2-</sup>                                        |
| 458.0619     | 458.0609       | 2              | 4.08E+08  | C <sub>2</sub>                                              |
| 474.0559     | 474.0566       | -1.5           | 1.13E+06  | Y <sub>2</sub> <sup>"</sup>                                 |
| 476.0715     | 476.0715       | -0.13          | 2979715   | Y <sub>2</sub>                                              |
| 500.0721     | 500.0715       | 1.1            | 604170.8  | <sup>2,4</sup> A <sub>4</sub>                               |
| 504.0666     | 504.0664       | 0.24           | 621596    | <sup>1,5</sup> X <sub>2</sub>                               |
| 528.067      | 528.0664       | 0.98           | 530658.8  | <sup>3,5</sup> A <sub>3</sub>                               |
| 539.1733     | 539.173        | 0.55           | 7734.6    | <sup>2,4</sup> X <sub>2</sub> -SO <sub>3</sub>              |
| 554.1367     | 554.1362       | 0.77           | 240976    | C <sub>3</sub> -SO <sub>3</sub>                             |
| 587.0799     | 587.0806       | -1.2           | 194752.9  | <sup>1,5</sup> A <sub>3</sub> <sup>'</sup>                  |
| 614.0679     | 614.0675       | 0.65           | 23024.5   | B <sub>3</sub> <sup>"</sup>                                 |
| 616.0831     | 616.0825       | 0.93           | 1.19E+07  | B <sub>3</sub>                                              |
| 619.1314     | 619.1298       | 2.6            | 47981.4   | <sup>2,4</sup> X <sub>2</sub>                               |
| 634.0936     | 634.0930       | 0.8            | 1.16E+07  | C <sub>3</sub>                                              |
| 659.1252     | 659.1253       | -0.25          | 5.11E+05  | Z <sub>3</sub> <sup>"</sup> -SO <sub>3</sub>                |
| 661.1415     | 661.1403       | 1.7            | 376637.7  | Z <sub>3</sub> -SO <sub>3</sub>                             |
| 677.1358     | 677.1359       | -0.19          | 6.53E+05  | Y <sub>3</sub> <sup>"</sup> -SO <sub>3</sub>                |
| 679.154      | 679.1509       | 4.5            | 86170.9   | Y <sub>3</sub> -SO <sub>3</sub>                             |
| 715.0584     | 715.0563       | 2.9            | 4254010   | C <sub>3</sub> +HSO <sub>3</sub>                            |
| 720.1542     | 720.1545       | -0.41          | 1496160.4 | <sup>0,2</sup> X <sub>3</sub> <sup>'</sup> -SO <sub>3</sub> |
| 740.0901     | 740.0901       | 0              | 821365.9  | Z <sub>3</sub> <sup>'</sup>                                 |
| 741.0974     | 741.0971       | 0.28           | 796138.7  | Z <sub>3</sub>                                              |
| 800.1113     | 800.1113       | 0              | 15970153  | <sup>0,2</sup> X <sub>3</sub> <sup>'</sup>                  |
| 818.1545     | 818.1554       | -1.2           | 655793.9  | [M-2H-SO <sub>3</sub> -H <sub>2</sub> O] <sup>-</sup>       |
| 827.097      | 827.0975       | -0.7           | 64767     | <sup>1,4</sup> A <sub>4</sub>                               |
| 836.1651     | 836.1654       | -0.35          | 1351615.3 | [M-2H-SO <sub>3</sub> ] <sup>-</sup>                        |
| 857.1083     | 857.1081       | 0.18           | 399077.3  | <sup>1,3</sup> X <sub>3</sub>                               |
| 872.1334     | 872.1332       | 0.14           | 747082.9  | [M-2H-CO <sub>2</sub> ] <sup>-</sup>                        |
| 898.1116     | 898.1122       | -0.74          | 1520385.9 | [M-2H-H <sub>2</sub> O] <sup>-</sup>                        |
| 916.122      | 916.1222       | -0.29          | 4964973   | [M-2H] <sup>-</sup>                                         |

Table S9: Fragment ion list for 193 nm UVPD activation of the [M-3H]<sup>3-</sup> precursor of DS dp4 in the high-pressure cell (8 pulses, 4 mJ).

| Measured m/z | Calculated m/z | Accuracy (PPM) | Intensity | Assigned Fragment                                            |
|--------------|----------------|----------------|-----------|--------------------------------------------------------------|
| 173.0092     | 173.0098       | -3.5           | 381285.4  | C <sub>1</sub> <sup>''</sup>                                 |
| 198.9918     | 198.9917       | 0.01           | 779947.4  | <sup>1,3</sup> X <sub>0</sub>                                |
| 227.5187     | 227.5198       | -5.1           | 326737.8  | Z <sub>2</sub> <sup>''2-</sup>                               |
| 227.5187     | 227.5198       | -5.1           | 326737.8  | C <sub>2</sub> <sup>''2-</sup>                               |
| 266.3678     | 266.3679       | -0.45          | 7675.3    | <sup>0,2</sup> X <sub>3</sub> <sup>3-</sup>                  |
| 282.0287     | 282.0289       | -0.74          | 9.23E+07  | Z <sub>1</sub>                                               |
| 300.0392     | 300.0394       | -0.91          | 4664430   | Y <sub>1</sub>                                               |
| 305.0382     | 305.0382       | -0.13          | 6.44E+07  | [M-3H] <sup>3-</sup>                                         |
| 328.0345     | 328.0343       | 0.33           | 2638980.5 | <sup>1,5</sup> X <sub>1</sub>                                |
| 342.0502     | 342.0500       | 0.46           | 3176481.5 | <sup>0,2</sup> X <sub>1</sub>                                |
| 357.0374     | 357.0379       | -1.5           | 1947957.5 | <sup>2,5</sup> X <sub>1</sub> <sup>'</sup>                   |
| 371.0528     | 371.0536       | -2.2           | 5988777.5 | <sup>0,3</sup> X <sub>1</sub> <sup>'</sup>                   |
| 379.0504     | 379.0502       | 0.43           | 1156924.5 | Y <sub>3</sub> <sup>2-</sup>                                 |
| 400.0536     | 400.0555       | -4.8           | 1049798.8 | <sup>0,2</sup> X <sub>3</sub> <sup>2-</sup>                  |
| 414.073      | 414.0717       | 2.9            | 38247732  | Z <sub>2</sub> -CO <sub>2</sub>                              |
| 414.073      | 414.0717       | 2.9            | 38247732  | C <sub>2</sub> -CO <sub>2</sub>                              |
| 435.0583     | 435.0582       | 0.09           | 274987.8  | <sup>1,5</sup> A <sub>4</sub> <sup>2-</sup>                  |
| 440.0507     | 440.0504       | 0.6            | 1500656.8 | B <sub>2</sub>                                               |
| 456.0455     | 456.0469       | -3.3           | 8195103.5 | Z <sub>2</sub> <sup>''</sup>                                 |
| 456.0455     | 456.0469       | -3.3           | 8195103.5 | C <sub>2</sub> <sup>''</sup>                                 |
| 457.5572     | 457.5576       | -1.1           | 2972730   | [M-3H] <sup>2-</sup>                                         |
| 458.0609     | 458.0609       | -0.21          | 6815683.5 | Z <sub>2</sub>                                               |
| 458.0609     | 458.0609       | -0.21          | 6815683.5 | [M-2H] <sup>2-</sup>                                         |
| 458.0609     | 458.0609       | -0.21          | 6815683.5 | C <sub>2</sub>                                               |
| 474.056      | 474.0565       | -1.2           | 5208735   | Y <sub>2</sub> <sup>''</sup>                                 |
| 476.0717     | 476.0715       | 0.28           | 997905.3  | Y <sub>2</sub>                                               |
| 504.0667     | 504.0664       | 0.44           | 624601.4  | <sup>1,5</sup> X <sub>2</sub>                                |
| 528.0666     | 528.0664       | 0.23           | 348820.6  | <sup>3,5</sup> A <sub>3</sub>                                |
| 573.0613     | 573.0649       | -6.3           | 7014      | <sup>0,2</sup> A <sub>3</sub> <sup>'</sup>                   |
| 588.0879     | 588.0876       | 0.49           | 684368    | <sup>1,5</sup> A <sub>3</sub>                                |
| 616.0817     | 616.0825       | -1.3           | 73377.5   | B <sub>3</sub>                                               |
| 619.1301     | 619.1298       | 0.47           | 66204.4   | <sup>2,4</sup> X <sub>2</sub>                                |
| 633.0854     | 633.0861       | -1.1           | 474579.1  | C <sub>3</sub> <sup>'</sup>                                  |
| 634.0934     | 634.0930       | 0.49           | 450427.7  | C <sub>3</sub>                                               |
| 677.1357     | 677.1359       | -0.29          | 678578.2  | Y <sub>3</sub> <sup>''</sup> -SO <sub>3</sub>                |
| 719.1464     | 719.1465       | -0.13          | 805124.3  | <sup>0,2</sup> X <sub>3</sub> <sup>''</sup> -SO <sub>3</sub> |
| 791.1675     | 791.1682       | -0.88          | 2156252   | [M-3H-SO <sub>3</sub> -CO <sub>2</sub> ] <sup>'</sup>        |
| 800.111      | 800.1113       | -0.37          | 1065954.3 | <sup>0,2</sup> X <sub>3</sub> <sup>'</sup>                   |
| 817.1469     | 817.148        | -1.3           | 205586.5  | [M-3H-SO <sub>3</sub> -H <sub>2</sub> O] <sup>'</sup>        |
| 828.1068     | 828.1049       | 2.3            | 37981     | <sup>1,4</sup> A <sub>4</sub>                                |
| 835.1575     | 835.1580       | -0.63          | 1022026.5 | [M-3H-SO <sub>3</sub> ] <sup>'</sup>                         |
| 871.1244     | 871.1251       | -0.8           | 134517.5  | [M-3H-CO <sub>2</sub> ] <sup>'</sup>                         |
| 915.1144     | 915.1143       | 0.1            | 106567.8  | [M-3H] <sup>'</sup>                                          |

Table S10: Fragment ion list for 193 nm UVPD activation of the  $[M-3H]^{3-}$  precursor of DS dp4 in the low-pressure cell (8 pulses, 4 mJ).

| Measured m/z | Calculated m/z | Accuracy (PPM) | Intensity | Assigned Fragment                                            |
|--------------|----------------|----------------|-----------|--------------------------------------------------------------|
| 157.0141     | 157.0142       | -0.93          | 227634.4  | B <sub>1</sub>                                               |
| 175.0248     | 175.0248       | -0.06          | 218615.2  | C <sub>1</sub>                                               |
| 198.9917     | 198.9917       | -0.48          | 541126.6  | <sup>1,3</sup> X <sub>0</sub>                                |
| 227.5187     | 227.5198       | -5.1           | 63811.5   | C <sub>2</sub> <sup>''2-</sup>                               |
| 227.5187     | 227.5198       | -5.1           | 63811.5   | Z <sub>2</sub> <sup>''2-</sup>                               |
| 237.5321     | 237.5321       | -0.18          | 525358.5  | Y <sub>2</sub> <sup>2-</sup>                                 |
| 266.3678     | 266.3679       | -0.45          | 464912    | <sup>0,2</sup> X <sub>3</sub> <sup>3-</sup>                  |
| 282.0285     | 282.0289       | -1.5           | 2.63E+07  | Z <sub>1</sub>                                               |
| 300.0391     | 300.0394       | -1.3           | 1661497.8 | Y <sub>1</sub>                                               |
| 305.0377     | 305.0382       | -1.8           | 4184672.3 | $[M-3H]^{3-}$                                                |
| 328.0341     | 328.0343       | -0.88          | 821421.7  | <sup>1,5</sup> X <sub>1</sub>                                |
| 342.05       | 342.0500       | -0.11          | 506899.2  | <sup>0,2</sup> X <sub>1</sub>                                |
| 357.0371     | 357.0379       | -2.4           | 428356.6  | <sup>2,5</sup> X <sub>1</sub> '                              |
| 371.0526     | 371.0536       | -2.7           | 378142.3  | <sup>0,3</sup> X <sub>1</sub> '                              |
| 379.05       | 379.0502       | -0.62          | 517511.9  | Y <sub>3</sub> <sup>2-</sup>                                 |
| 400.0548     | 400.0555       | -1.8           | 245070.9  | <sup>0,2</sup> X <sub>3</sub> <sup>2-</sup>                  |
| 414.0709     | 414.0717       | -2.1           | 9353081   | Z <sub>2</sub> -CO <sub>2</sub>                              |
| 414.0709     | 414.0717       | -2.1           | 9353081   | C <sub>2</sub> -CO <sub>2</sub>                              |
| 440.0502     | 440.0504       | -0.53          | 1163178.1 | B <sub>2</sub>                                               |
| 456.0451     | 456.0469       | -4.1           | 1724189.4 | Z <sub>2</sub> <sup>''</sup>                                 |
| 456.0451     | 456.0469       | -4.1           | 1724189.4 | C <sub>2</sub> <sup>''</sup>                                 |
| 457.5567     | 457.5576       | -2.2           | 64861.9   | $[M-3H]^{2-}$                                                |
| 458.0607     | 458.0609       | -0.65          | 1622287.1 | C <sub>2</sub>                                               |
| 458.0607     | 458.0609       | -0.65          | 1622287.1 | $[M-2H]^{2-}$                                                |
| 458.0607     | 458.0609       | -0.65          | 1622287.1 | Z <sub>2</sub>                                               |
| 474.0556     | 474.0565       | -2             | 876162.2  | Y <sub>2</sub> <sup>''</sup>                                 |
| 476.0712     | 476.0715       | -0.76          | 533658.4  | Y <sub>2</sub>                                               |
| 500.0714     | 500.0715       | -0.32          | 106240.6  | <sup>2,4</sup> A <sub>3</sub>                                |
| 504.0662     | 504.0664       | -0.55          | 246322.6  | <sup>1,5</sup> X <sub>2</sub>                                |
| 528.0662     | 528.0664       | -0.52          | 88348     | <sup>3,5</sup> A <sub>3</sub>                                |
| 588.0872     | 588.0876       | -0.69          | 145997.2  | <sup>1,5</sup> A <sub>3</sub>                                |
| 633.0811     | 633.0861       | -7.9           | 14447.8   | C <sub>3</sub> '                                             |
| 634.0929     | 634.0930       | -0.29          | 70532.3   | C <sub>3</sub>                                               |
| 677.1348     | 677.1359       | -1.6           | 321440.4  | Y <sub>3</sub> <sup>''</sup> -SO <sub>3</sub>                |
| 719.1453     | 719.1465       | -1.7           | 138785.3  | <sup>0,2</sup> X <sub>3</sub> <sup>''</sup> -SO <sub>3</sub> |
| 791.1664     | 791.1682       | -2.3           | 196611.8  | $[M-3H-SO_3-CO_2]^-$                                         |
| 800.1136     | 800.1113       | 2.9            | 26510.4   | <sup>0,2</sup> X <sub>3</sub> '                              |
| 817.1457     | 817.148        | -2.8           | 16450.2   | $[M-3H-SO_3-H_2O]^-$                                         |
| 835.1558     | 835.1580       | -2.7           | 101698    | $[M-3H-SO_3]^-$                                              |

Table S11: Fragment ion list for 193 nm UVPD activation of the [M-3H]<sup>3-</sup> precursor of DS dp4 in the high-pressure cell (4 pulses, 4 mJ).

| Measured m/z | Calculated m/z | Accuracy (PPM) | Intensity | Assigned Fragment                                     |
|--------------|----------------|----------------|-----------|-------------------------------------------------------|
| 157.0143     | 157.0142       | 0.33           | 112723    | B <sub>1</sub>                                        |
| 173.0094     | 173.0098       | -2.3           | 325398    | C <sub>1</sub> "                                      |
| 175.0247     | 175.0248       | -0.63          | 93456.5   | C <sub>1</sub>                                        |
| 198.9917     | 198.9917       | -0.48          | 247650.4  | <sup>1,3</sup> X <sub>0</sub>                         |
| 227.5192     | 227.5198       | -2.9           | 416323.8  | Z <sub>2</sub> " <sup>2-</sup>                        |
| 227.5192     | 227.5198       | -2.9           | 416323.8  | C <sub>2</sub> " <sup>2-</sup>                        |
| 237.5322     | 237.5321       | 0.23           | 430151.8  | Y <sub>2</sub> <sup>2-</sup>                          |
| 266.3676     | 266.3679       | -1.2           | 15420.1   | <sup>0,2</sup> X <sub>3</sub> <sup>3-</sup>           |
| 282.0288     | 282.0289       | -0.39          | 7.44E+07  | Z <sub>1</sub>                                        |
| 300.0394     | 300.0394       | -0.25          | 1976159.1 | Y <sub>1</sub>                                        |
| 305.0387     | 305.0382       | 1.5            | 2.24E+08  | [M-3H] <sup>3-</sup>                                  |
| 328.0346     | 328.0343       | 0.64           | 1982057.5 | <sup>1,5</sup> X <sub>1</sub>                         |
| 342.0503     | 342.0500       | 0.76           | 1089795.6 | <sup>0,2</sup> X <sub>1</sub>                         |
| 357.0375     | 357.0379       | -1.3           | 1835419.3 | <sup>2,5</sup> X <sub>1</sub> '                       |
| 371.053      | 371.0536       | -1.6           | 6579420.5 | <sup>0,3</sup> X <sub>1</sub> '                       |
| 379.0506     | 379.0502       | 0.95           | 1039833.5 | Y <sub>3</sub> <sup>2-</sup>                          |
| 400.0539     | 400.0555       | -4             | 1381661.6 | <sup>0,2</sup> X <sub>3</sub> <sup>2-</sup>           |
| 414.0715     | 414.0717       | -0.7           | 37404120  | Z <sub>2</sub> -CO <sub>2</sub>                       |
| 414.0715     | 414.0717       | -0.7           | 37404120  | C <sub>2</sub> -CO <sub>2</sub>                       |
| 435.0586     | 435.0582       | 0.78           | 262323.9  | <sup>1,5</sup> A <sub>4</sub> <sup>2-</sup>           |
| 440.051      | 440.0504       | 1.3            | 1094002.9 | B <sub>2</sub>                                        |
| 456.0458     | 456.0469       | -2.6           | 6997210   | Z <sub>2</sub> "                                      |
| 456.0458     | 456.0469       | -2.6           | 6997210   | C <sub>2</sub> "                                      |
| 457.5575     | 457.5576       | -0.41          | 3677603.3 | [M-3H] <sup>2-</sup>                                  |
| 458.0611     | 458.0609       | 0.22           | 6162838.5 | Z <sub>2</sub>                                        |
| 458.0611     | 458.0609       | 0.22           | 6162838.5 | [M-2H] <sup>2-</sup>                                  |
| 458.0611     | 458.0609       | 0.22           | 6162838.5 | C <sub>2</sub>                                        |
| 474.0563     | 474.0565       | -0.54          | 4324970   | Y <sub>2</sub> "                                      |
| 504.067      | 504.0664       | 1              | 363802.8  | <sup>1,5</sup> X <sub>2</sub>                         |
| 528.067      | 528.0664       | 0.98           | 292350.1  | <sup>3,5</sup> A <sub>3</sub>                         |
| 573.0597     | 573.0649       | -9.1           | 205772.9  | <sup>0,2</sup> A <sub>3</sub> '                       |
| 588.0883     | 588.0876       | 1.2            | 532729.5  | <sup>1,5</sup> A <sub>3</sub>                         |
| 615.0756     | 615.0755       | 0.16           | 186421.2  | B <sub>3</sub> '                                      |
| 616.0819     | 616.0825       | -1             | 61322     | B <sub>3</sub>                                        |
| 619.1323     | 619.1298       | 4              | 20744.1   | <sup>2,4</sup> X <sub>2</sub>                         |
| 632.0782     | 632.0780       | 0.18           | 246210.8  | C <sub>3</sub> "                                      |
| 634.094      | 634.0930       | 1.4            | 347995.8  | C <sub>3</sub>                                        |
| 677.1363     | 677.1359       | 0.59           | 428713.9  | Y <sub>3</sub> "-SO <sub>3</sub>                      |
| 719.1467     | 719.1465       | 0.27           | 335221    | <sup>0,2</sup> X <sub>3</sub> "-SO <sub>3</sub>       |
| 775.137      | 775.1363       | 0.9            | 450231.7  | <sup>1,3</sup> X <sub>3</sub> "-SO <sub>3</sub>       |
| 791.1682     | 791.1682       | 0              | 1263949   | [M-3H-SO <sub>3</sub> -CO <sub>2</sub> ] <sup>-</sup> |
| 800.1117     | 800.1113       | 0.49           | 833865.9  | <sup>0,2</sup> X <sub>3</sub> '                       |
| 817.1481     | 817.148        | 0.12           | 114732.1  | [M-3H-SO <sub>3</sub> -H <sub>2</sub> O] <sup>-</sup> |
| 835.1581     | 835.1580       | 0.08           | 642817.6  | [M-3H-SO <sub>3</sub> ] <sup>-</sup>                  |
| 871.1254     | 871.1251       | 0.34           | 41361.7   | [M-3H-CO <sub>2</sub> ] <sup>-</sup>                  |

Table S12: Fragment ion list for 193 nm UVPD activation of the [M-3H]<sup>3-</sup> precursor of CS-A dp4 in the high-pressure cell (8 pulses, 4 mJ).

| Measured m/z | Calculated m/z | Accuracy (PPM) | Intensity | Assigned Fragment                                            |
|--------------|----------------|----------------|-----------|--------------------------------------------------------------|
| 173.009      | 173.0098       | -4.6           | 1428054.1 | C <sub>1</sub> <sup>''</sup>                                 |
| 198.9916     | 198.9917       | -0.98          | 2410980.5 | <sup>1,3</sup> X <sub>0</sub>                                |
| 227.5188     | 227.5198       | -4.7           | 1909038.5 | Z <sub>2</sub> <sup>''2-</sup>                               |
| 227.5188     | 227.5198       | -4.7           | 1909038.5 | C <sub>2</sub> <sup>''2-</sup>                               |
| 266.3676     | 266.3679       | -1.2           | 55167.8   | <sup>0,2</sup> X <sub>3</sub> <sup>3-</sup>                  |
| 282.0286     | 282.0289       | -1.1           | 2.77E+08  | Z <sub>1</sub>                                               |
| 300.0393     | 300.0394       | -0.58          | 1.74E+07  | Y <sub>1</sub>                                               |
| 305.0381     | 305.0382       | -0.45          | 2.63E+08  | [M-3H] <sup>3-</sup>                                         |
| 328.0341     | 328.0343       | -0.88          | 6353023.5 | <sup>1,5</sup> X <sub>1</sub>                                |
| 342.0497     | 342.0500       | -0.99          | 1.24E+07  | <sup>0,2</sup> X <sub>1</sub>                                |
| 357.0368     | 357.0379       | -3.2           | 4.24E+06  | <sup>2,5</sup> X <sub>1</sub> <sup>'</sup>                   |
| 371.0524     | 371.0536       | -3.2           | 2.10E+07  | <sup>0,3</sup> X <sub>1</sub> <sup>'</sup>                   |
| 379.0499     | 379.0502       | -0.88          | 4756848   | Y <sub>3</sub> <sup>2-</sup>                                 |
| 400.0532     | 400.0555       | -5.8           | 6957444   | <sup>0,2</sup> X <sub>3</sub> <sup>2-</sup>                  |
| 414.0708     | 414.0717       | -2.4           | 173417392 | Z <sub>2</sub> -CO <sub>2</sub>                              |
| 414.0708     | 414.0717       | -2.4           | 173417392 | C <sub>2</sub> -CO <sub>2</sub>                              |
| 435.0579     | 435.0582       | -0.82          | 2015001.1 | <sup>1,5</sup> A <sub>4</sub> <sup>2-</sup>                  |
| 440.0505     | 440.0504       | 0.15           | 4174323.3 | B <sub>2</sub>                                               |
| 456.0451     | 456.0469       | -4.1           | 26351570  | Z <sub>2</sub> <sup>''</sup>                                 |
| 456.0451     | 456.0469       | -4.1           | 26351570  | C <sub>2</sub> <sup>''</sup>                                 |
| 457.5568     | 457.5576       | -1.9           | 16107254  | [M-3H] <sup>2-</sup>                                         |
| 458.0602     | 458.0609       | -1.7           | 2.41E+07  | Z <sub>2</sub>                                               |
| 458.0602     | 458.0609       | -1.7           | 2.41E+07  | [M-2H] <sup>2-</sup>                                         |
| 458.0602     | 458.0609       | -1.7           | 2.41E+07  | C <sub>2</sub>                                               |
| 474.0556     | 474.0565       | -2             | 1.04E+07  | Y <sub>2</sub> <sup>''</sup>                                 |
| 476.0712     | 476.0715       | -0.76          | 4496472   | Y <sub>2</sub>                                               |
| 500.0717     | 500.0715       | 0.27           | 501382.8  | <sup>2,4</sup> A <sub>3</sub>                                |
| 504.0662     | 504.0664       | -0.55          | 1589974.6 | <sup>1,5</sup> X <sub>2</sub>                                |
| 528.0662     | 528.0664       | -0.52          | 1369161.5 | <sup>3,5</sup> A <sub>3</sub>                                |
| 573.0597     | 573.0649       | -9.1           | 24935.5   | <sup>0,2</sup> A <sub>3</sub> <sup>'</sup>                   |
| 588.0874     | 588.0876       | -0.35          | 4527201   | <sup>1,5</sup> A <sub>3</sub>                                |
| 615.0745     | 615.0755       | -1.6           | 1289869.4 | B <sub>3</sub> <sup>'</sup>                                  |
| 616.0814     | 616.0825       | -1.8           | 507767.9  | B <sub>3</sub>                                               |
| 619.1296     | 619.1298       | -0.33          | 358531.8  | <sup>2,4</sup> X <sub>2</sub>                                |
| 632.0773     | 632.0780       | -1.2           | 1338071.6 | C <sub>3</sub> <sup>''</sup>                                 |
| 634.0929     | 634.0930       | -0.29          | 9563548   | C <sub>3</sub>                                               |
| 677.1351     | 677.1359       | -1.2           | 2473670.5 | Y <sub>3</sub> <sup>''</sup> -SO <sub>3</sub>                |
| 719.1458     | 719.1465       | -0.97          | 3517010.5 | <sup>0,2</sup> X <sub>3</sub> <sup>''</sup> -SO <sub>3</sub> |
| 791.1668     | 791.1682       | -1.8           | 14645490  | [M-3H-CO <sub>2</sub> -SO <sub>3</sub> ] <sup>'</sup>        |
| 800.11       | 800.1113       | -1.6           | 3338681   | <sup>0,2</sup> X <sub>3</sub> <sup>'</sup>                   |
| 817.146      | 817.148        | -2.4           | 971407.4  | [M-3H-SO <sub>3</sub> -H <sub>2</sub> O] <sup>'</sup>        |
| 828.105      | 828.1049       | 0.12           | 132965.6  | <sup>1,4</sup> A <sub>4</sub>                                |
| 835.1566     | 835.1580       | -1.7           | 5283968.5 | [M-3H-SO <sub>3</sub> ] <sup>'</sup>                         |
| 871.1234     | 871.1251       | -2             | 1028001.1 | [M-3H-CO <sub>2</sub> ] <sup>'</sup>                         |
| 915.1132     | 915.1143       | -1.2           | 708207.2  | [M-3H] <sup>'</sup>                                          |

Table S13: Fragment ion list for 193 nm UVPD activation of the  $[M-3H]^{3-}$  precursor of CS-A dp4 in the low-pressure cell (8 pulses, 4 mJ).

| Measured m/z | Calculated m/z | Accuracy (PPM) | Intensity | Assigned Fragment                                            |
|--------------|----------------|----------------|-----------|--------------------------------------------------------------|
| 157.0139     | 157.0142       | -2.2           | 764433.8  | B <sub>1</sub>                                               |
| 173.0088     | 173.0098       | -5.8           | 509262.8  | C <sub>1</sub> <sup>''</sup>                                 |
| 175.0245     | 175.0248       | -1.8           | 616644    | C <sub>1</sub>                                               |
| 198.9914     | 198.9917       | -2             | 1931929.1 | <sup>1,3</sup> X <sub>0</sub>                                |
| 227.5186     | 227.5198       | -5.5           | 630660.4  | Z <sub>2</sub> <sup>''2-</sup>                               |
| 227.5186     | 227.5198       | -5.5           | 630660.4  | C <sub>2</sub> <sup>''2-</sup>                               |
| 237.5317     | 237.5321       | -1.9           | 1307501.1 | Y <sub>2</sub> <sup>2-</sup>                                 |
| 266.3674     | 266.3679       | -2             | 102129.3  | <sup>0,2</sup> X <sub>3</sub> <sup>3-</sup>                  |
| 282.0284     | 282.0289       | -1.8           | 7.74E+07  | Z <sub>1</sub>                                               |
| 300.0389     | 300.0394       | -1.9           | 1.13E+07  | Y <sub>1</sub>                                               |
| 305.0377     | 305.0382       | -1.8           | 8.02E+07  | $[M-3H]^{3-}$                                                |
| 328.0338     | 328.0343       | -1.8           | 2645442   | <sup>1,5</sup> X <sub>1</sub>                                |
| 341.0416     | 341.043        | -4.1           | 3.03E+05  | <sup>0,2</sup> X <sub>1</sub> <sup>'</sup>                   |
| 357.0364     | 357.0379       | -4.3           | 1.16E+06  | <sup>2,5</sup> X <sub>1</sub> <sup>'</sup>                   |
| 371.052      | 371.0536       | -4.3           | 3.12E+06  | <sup>0,3</sup> X <sub>1</sub> <sup>'</sup>                   |
| 379.0495     | 379.0502       | -1.9           | 3390571.5 | Y <sub>3</sub> <sup>2-</sup>                                 |
| 400.0537     | 400.0555       | -4.5           | 1971418.6 | <sup>0,2</sup> X <sub>3</sub> <sup>2-</sup>                  |
| 414.0704     | 414.0717       | -3.4           | 4.16E+07  | Z <sub>2</sub> -CO <sub>2</sub>                              |
| 414.0704     | 414.0717       | -3.4           | 4.16E+07  | C <sub>2</sub> -CO <sub>2</sub>                              |
| 435.0573     | 435.0582       | -2.2           | 233480.2  | <sup>1,5</sup> A <sub>4</sub> <sup>2-</sup>                  |
| 440.0499     | 440.0504       | -1.2           | 2026331.4 | B <sub>2</sub>                                               |
| 456.0444     | 456.0469       | -5.7           | 6713159   | Z <sub>2</sub> <sup>''</sup>                                 |
| 456.0444     | 456.0469       | -5.7           | 6713159   | C <sub>2</sub> <sup>''</sup>                                 |
| 457.5562     | 457.5576       | -3.3           | 887101.1  | $[M-3H]^{2-}$                                                |
| 458.0601     | 458.0609       | -2             | 8004435.5 | Z <sub>2</sub>                                               |
| 458.0601     | 458.0609       | -2             | 8004435.5 | $[M-2H]^{2-}$                                                |
| 458.0601     | 458.0609       | -2             | 8004435.5 | C <sub>2</sub>                                               |
| 474.055      | 474.0565       | -3.3           | 1762344   | Y <sub>2</sub> <sup>''</sup>                                 |
| 476.0706     | 476.0715       | -2             | 2468611.5 | Y <sub>2</sub>                                               |
| 500.0707     | 500.0715       | -1.7           | 1716128   | <sup>2,4</sup> A <sub>3</sub>                                |
| 504.0656     | 504.0664       | -1.7           | 610999.5  | <sup>1,5</sup> X <sub>2</sub>                                |
| 528.0655     | 528.0664       | -1.9           | 368275.9  | <sup>3,5</sup> A <sub>3</sub>                                |
| 588.0865     | 588.0876       | -1.9           | 862843.8  | <sup>1,5</sup> A <sub>3</sub>                                |
| 615.0734     | 615.0755       | -3.4           | 49127.7   | B <sub>3</sub> <sup>'</sup>                                  |
| 616.0815     | 616.0825       | -1.7           | 120361.8  | B <sub>3</sub>                                               |
| 619.1285     | 619.1298       | -2.1           | 19601     | <sup>2,4</sup> X <sub>2</sub>                                |
| 632.0765     | 632.0780       | -2.5           | 200389.6  | C <sub>3</sub> <sup>''</sup>                                 |
| 634.092      | 634.0930       | -1.7           | 1529364.6 | C <sub>3</sub>                                               |
| 677.1342     | 677.1359       | -2.5           | 969444.1  | Y <sub>3</sub> <sup>''</sup> -SO <sub>3</sub>                |
| 719.1447     | 719.1465       | -2.5           | 710339.9  | <sup>0,2</sup> X <sub>3</sub> <sup>''</sup> -SO <sub>3</sub> |
| 791.1657     | 791.1682       | -3.2           | 1261714.9 | $[M-3H-SO_3-CO_2]^-$                                         |
| 800.1089     | 800.1113       | -3             | 282980.8  | <sup>0,2</sup> X <sub>3</sub> <sup>'</sup>                   |
| 817.1447     | 817.148        | -4             | 56492.6   | $[M-3H-SO_3-H_2O]^-$                                         |
| 835.1555     | 835.1580       | -3             | 503955.9  | $[M-3H-SO_3]^-$                                              |

Table S14: Fragment ion list for 193 nm UVPD activation of the [M-3H]<sup>3-</sup> precursor of CS-A dp4 in the high-pressure cell (4 pulses, 4 mJ).

| Measured m/z | Calculated m/z | Accuracy (PPM) | Intensity | Assigned Fragment                                            |
|--------------|----------------|----------------|-----------|--------------------------------------------------------------|
| 173.0091     | 173.0098       | -4             | 1211537.6 | C <sub>1</sub> <sup>''</sup>                                 |
| 198.9917     | 198.9917       | -0.48          | 7.56E+05  | <sup>1,3</sup> X <sub>0</sub>                                |
| 227.5189     | 227.5198       | -4.2           | 1958871.6 | Z <sub>2</sub> <sup>''2-</sup>                               |
| 227.5189     | 227.5198       | -4.2           | 1958871.6 | C <sub>2</sub> <sup>''2-</sup>                               |
| 266.3672     | 266.3679       | -2.7           | 108060    | <sup>0,2</sup> X <sub>3</sub> <sup>3-</sup>                  |
| 282.0288     | 282.0289       | -0.39          | 2.12E+08  | Z <sub>1</sub>                                               |
| 300.0396     | 300.0394       | 0.41           | 8292346.5 | Y <sub>1</sub>                                               |
| 305.0386     | 305.0382       | 1.2            | 7.54E+08  | [M-3H] <sup>3-</sup>                                         |
| 328.0343     | 328.0343       | -0.27          | 4495393.5 | <sup>1,5</sup> X <sub>1</sub>                                |
| 342.0499     | 342.0500       | -0.4           | 4077744.8 | <sup>0,2</sup> X <sub>1</sub>                                |
| 357.037      | 357.0379       | -2.7           | 3750311.8 | <sup>2,5</sup> X <sub>1</sub> <sup>'</sup>                   |
| 371.0527     | 371.0536       | -2.4           | 21302490  | <sup>0,3</sup> X <sub>1</sub> <sup>'</sup>                   |
| 379.0502     | 379.0502       | -0.09          | 4104255.3 | Y <sub>3</sub> <sup>2-</sup>                                 |
| 400.0535     | 400.0555       | -5             | 7853565   | <sup>0,2</sup> X <sub>3</sub> <sup>2-</sup>                  |
| 414.0711     | 414.0717       | -1.7           | 157626288 | Z <sub>2</sub> -CO <sub>2</sub>                              |
| 414.0711     | 414.0717       | -1.7           | 157626288 | C <sub>2</sub> -CO <sub>2</sub>                              |
| 435.0583     | 435.0582       | 0.09           | 1531235.5 | <sup>1,5</sup> A <sub>4</sub> <sup>2-</sup>                  |
| 440.051      | 440.0504       | 1.3            | 2608724   | B <sub>2</sub>                                               |
| 456.0454     | 456.0469       | -3.5           | 21768876  | Z <sub>2</sub> <sup>''</sup>                                 |
| 456.0454     | 456.0469       | -3.5           | 21768876  | C <sub>2</sub> <sup>''</sup>                                 |
| 457.5572     | 457.5576       | -1.1           | 16673176  | [M-3H] <sup>2-</sup>                                         |
| 458.0605     | 458.0609       | -1.1           | 2.03E+07  | Z <sub>2</sub>                                               |
| 458.0605     | 458.0609       | -1.1           | 2.03E+07  | [M-2H] <sup>2-</sup>                                         |
| 458.0605     | 458.0609       | -1.1           | 2.03E+07  | C <sub>2</sub>                                               |
| 474.056      | 474.0565       | -1.2           | 8.20E+06  | Y <sub>2</sub> <sup>''</sup>                                 |
| 504.0665     | 504.0664       | 0.04           | 850755.9  | <sup>1,5</sup> X <sub>2</sub>                                |
| 528.0667     | 528.0664       | 0.42           | 977573.4  | <sup>3,5</sup> A <sub>3</sub>                                |
| 573.0659     | 573.0649       | 1.7            | 4.27E+04  | <sup>0,2</sup> A <sub>3</sub> <sup>'</sup>                   |
| 588.0879     | 588.0876       | 0.49           | 3291947.8 | <sup>1,5</sup> A <sub>3</sub>                                |
| 615.075      | 615.0755       | -0.81          | 967091.1  | B <sub>3</sub> <sup>'</sup>                                  |
| 616.0808     | 616.0825       | -2.8           | 313427.3  | B <sub>3</sub>                                               |
| 619.1295     | 619.1298       | -0.49          | 106927.9  | <sup>2,4</sup> X <sub>2</sub>                                |
| 632.0778     | 632.0780       | -0.44          | 864503.6  | C <sub>3</sub> <sup>''</sup>                                 |
| 634.0934     | 634.0930       | 0.49           | 7280671   | C <sub>3</sub>                                               |
| 677.1356     | 677.1359       | -0.44          | 1257629.9 | Y <sub>3</sub> <sup>''</sup> -SO <sub>3</sub>                |
| 719.1462     | 719.1465       | -0.41          | 1309795.9 | <sup>0,2</sup> X <sub>3</sub> <sup>''</sup> -SO <sub>3</sub> |
| 791.1674     | 791.1682       | -1             | 7875305.5 | [M-3H-CO <sub>2</sub> -SO <sub>3</sub> ] <sup>'</sup>        |
| 800.1107     | 800.1113       | -0.74          | 2201241.3 | <sup>0,2</sup> X <sub>3</sub> <sup>'</sup>                   |
| 817.1465     | 817.148        | -1.8           | 509871.3  | [M-3H-SO <sub>3</sub> -H <sub>2</sub> O] <sup>'</sup>        |
| 835.157      | 835.1580       | -1.2           | 2740336.5 | [M-3H-SO <sub>3</sub> ] <sup>'</sup>                         |
| 871.1241     | 871.1251       | -1.1           | 299677.5  | [M-3H-CO <sub>2</sub> ] <sup>'</sup>                         |
| 915.1143     | 915.1143       | 0              | 170128    | [M-3H] <sup>'</sup>                                          |

Table S15: Fragment ion list for 193 nm UVPD activation of the [M-4H+Na]<sup>3-</sup> precursor of CS-A dp4 in the high-pressure cell (8 pulses, 4 mJ).

| Measured m/z | Calculated m/z | Accuracy (PPM) | Intensity | Assigned Fragment                                                         |
|--------------|----------------|----------------|-----------|---------------------------------------------------------------------------|
| 173.009      | 173.0098       | -4.6           | 256207.8  | C <sub>1</sub> <sup>''</sup>                                              |
| 175.0246     | 175.0248       | -1.2           | 321594.2  | C <sub>1</sub> <sup>''</sup>                                              |
| 198.9916     | 198.9917       | -0.98          | 440792    | <sup>1,3</sup> X <sub>0</sub>                                             |
| 282.0286     | 282.0289       | -1.1           | 1.20E+07  | Z <sub>1</sub>                                                            |
| 300.0392     | 300.0394       | -0.91          | 1607087.6 | Y <sub>1</sub>                                                            |
| 304.0105     | 304.0108       | -1.2           | 1736888.6 | Z <sub>1</sub> +Na                                                        |
| 312.3652     | 312.3655       | -1.1           | 3.36E+07  | [M-4H+Na] <sup>3-</sup>                                                   |
| 328.034      | 328.0343       | -1.2           | 1000586.1 | <sup>1,5</sup> X <sub>1</sub>                                             |
| 342.0497     | 342.0500       | -0.99          | 1696293.6 | <sup>0,2</sup> X <sub>1</sub>                                             |
| 350.0159     | 350.0163       | -1.2           | 3717047.5 | <sup>1,5</sup> X <sub>1</sub> +Na                                         |
| 369.0355     | 369.038        | -6.8           | 661124.3  | Z <sub>3</sub> <sup>''2-</sup>                                            |
| 390.0408     | 390.0412       | -1             | 3203229   | [Y <sub>3</sub> +Na] <sup>2-</sup>                                        |
| 414.0707     | 414.0717       | -2.6           | 14669782  | Z <sub>2</sub> -CO <sub>2</sub>                                           |
| 414.0707     | 414.0717       | -2.6           | 14669782  | C <sub>2</sub> -CO <sub>2</sub>                                           |
| 434.0314     | 434.0374       | -14            | 142960    | <sup>1,5</sup> A <sub>2</sub> <sup>''</sup> +Na                           |
| 446.0487     | 446.0492       | -1.2           | 276977.2  | [ <sup>1,5</sup> A <sub>4</sub> +Na] <sup>2-</sup>                        |
| 456.0448     | 456.0469       | -4.8           | 4493237   | Z <sub>2</sub> <sup>''</sup>                                              |
| 456.0448     | 456.0469       | -4.8           | 4493237   | C <sub>2</sub> <sup>''</sup>                                              |
| 469.0493     | 469.0519       | -5.7           | 450568.3  | [M-4H+Na] <sup>2-</sup>                                                   |
| 479.0346     | 479.0359       | -2.7           | 7654003.5 | Z <sub>2</sub> <sup>''</sup> +Na                                          |
| 479.0346     | 479.0359       | -2.7           | 7654003.5 | C <sub>2</sub> <sup>''</sup> +Na                                          |
| 496.0374     | 496.0395       | -4.2           | 613693.5  | Y <sub>2</sub> <sup>''</sup> +Na                                          |
| 498.053      | 498.0535       | -1             | 1105643   | Y <sub>2</sub> +Na                                                        |
| 522.053      | 522.0535       | -0.97          | 120183.5  | <sup>2,4</sup> A <sub>3</sub> +Na                                         |
| 526.0479     | 526.0484       | -0.99          | 218115.1  | <sup>1,5</sup> X <sub>2</sub> +Na                                         |
| 528.0659     | 528.0664       | -1.1           | 28116.8   | <sup>3,5</sup> A <sub>3</sub> +Na                                         |
| 565.0331     | 565.0363       | -5.7           | 4081      | <sup>0,3</sup> A <sub>3</sub> <sup>''</sup> +Na                           |
| 609.0611     | 609.0626       | -2.5           | 200538.7  | <sup>1,5</sup> A <sub>3</sub> <sup>''</sup> +Na                           |
| 637.056      | 637.0575       | -2.4           | 1934383.6 | B <sub>3</sub> <sup>''</sup> +Na                                          |
| 656.0745     | 656.0750       | -0.8           | 1324433.8 | C <sub>3</sub> +Na                                                        |
| 699.1167     | 699.1179       | -1.7           | 748532.2  | Y <sub>3</sub> <sup>''</sup> +Na-SO <sub>3</sub>                          |
| 719.1248     | 719.1229       | 2.6            | 407274.6  | <sup>2,5</sup> A <sub>4</sub> <sup>''</sup> -SO <sub>3</sub>              |
| 741.0984     | 741.0971       | 1.6            | 21590.1   | Z <sub>3</sub>                                                            |
| 763.0785     | 763.0791       | -0.82          | 1177829.3 | Z <sub>3</sub> +Na                                                        |
| 779.0733     | 779.0747       | -1.8           | 406034.2  | Y <sub>3</sub> <sup>''</sup> +Na                                          |
| 781.089      | 781.0896       | -0.88          | 530058.4  | Y <sub>3</sub> +Na                                                        |
| 795.1592     | 795.1517       | 9.4            | 8380.3    | [M-4H+Na-SO <sub>3</sub> -CO <sub>2</sub> -H <sub>2</sub> O] <sup>-</sup> |
| 813.1481     | 813.1517       | -4.4           | 579796.9  | [M-4H+Na-SO <sub>3</sub> -CO <sub>2</sub> ] <sup>-</sup>                  |
| 823.0952     | 823.1002       | -6.1           | 1539003.9 | <sup>0,2</sup> X <sub>3</sub> <sup>''</sup> +Na                           |
| 839.1268     | 839.1309       | -4.9           | 59953     | [M-4H+Na-SO <sub>3</sub> -H <sub>2</sub> O] <sup>-</sup>                  |
| 849.1151     | 849.1186       | -4.1           | 1044659.8 | [M-4H+Na-2CO <sub>2</sub> ] <sup>-</sup>                                  |
| 893.1048     | 893.1079       | -3.4           | 77258     | [M-4H+Na-CO <sub>2</sub> ] <sup>-</sup>                                   |
| 937.0945     | 937.0972       | -2.9           | 705435.6  | [M-4H+Na] <sup>-</sup>                                                    |



Table S16: Fragment ion list for 193 nm UVPD activation of the  $[M-4H+Na]^{3-}$  precursor of DS dp4 in the high-pressure cell (8 pulses, 4 mJ).

| Measured m/z | Calculated m/z | Accuracy (PPM) | Intensity | Assigned Fragment       |
|--------------|----------------|----------------|-----------|-------------------------|
| 173.0089     | 173.0098       | -5.2           | 199847.3  | $C_1''$                 |
| 175.0249     | 175.0248       | 0.5            | 138870.5  | $C_1$                   |
| 198.9916     | 198.9917       | -0.98          | 160745.4  | $^{1,3}X_0$             |
| 282.0284     | 282.0289       | -1.8           | 4998976.5 | $Z_1$                   |
| 300.0391     | 300.0394       | -1.3           | 518889.6  | $Y_1$                   |
| 304.0104     | 304.0108       | -1.5           | 418420.8  | $Z_1+Na$                |
| 312.3649     | 312.3655       | -2.1           | 1477232.5 | $[M-4H+Na]^{3-}$        |
| 328.0341     | 328.0343       | -0.88          | 356449.3  | $^{1,5}X_1$             |
| 342.0499     | 342.0500       | -0.4           | 445879.2  | $^{0,2}X_1$             |
| 350.0162     | 350.0163       | -0.38          | 857283.6  | $^{1,5}X_1+Na$          |
| 390.041      | 390.0412       | -0.53          | 1308640.3 | $[Y_3+Na]^{2-}$         |
| 414.0709     | 414.0717       | -2.1           | 3926893   | $Z_2-CO_2$              |
| 414.0709     | 414.0717       | -2.1           | 3926893   | $C_2-CO_2$              |
| 434.0379     | 434.0374       | 1              | 9910.1    | $^{1,5}A_2'+Na$         |
| 456.045      | 456.0469       | -4.4           | 1151781.3 | $Z_2''$                 |
| 456.045      | 456.0469       | -4.4           | 1151781.3 | $C_2''$                 |
| 469.0496     | 469.0519       | -5.1           | 46750     | $[M-4H+Na]^{2-}$        |
| 479.0348     | 479.0359       | -2.3           | 2121329.3 | $Z_2'+Na$               |
| 479.0348     | 479.0359       | -2.3           | 2121329.3 | $C_2'+Na$               |
| 498.0531     | 498.0535       | -0.81          | 437572.4  | $Y_2+Na$                |
| 550.048      | 550.0484       | -0.76          | 67685.5   | $^{3,5}A_3+Na$          |
| 637.0561     | 637.0575       | -2.2           | 420323.8  | $B_3'+Na$               |
| 656.0743     | 656.0750       | -1.1           | 334548.3  | $C_3+Na$                |
| 701.1324     | 701.1328       | -0.68          | 134599    | $Y_3+Na-SO_3$           |
| 763.0783     | 763.0791       | -1.1           | 435433.5  | $Z_3+Na$                |
| 781.0889     | 781.0896       | -1             | 766180.5  | $Y_3+Na$                |
| 813.1483     | 813.1517       | -4.2           | 115379.3  | $[M-4H+Na-SO_3-CO_2]^-$ |
| 823.0953     | 823.1002       | -6             | 221509.7  | $^{0,2}X_3'+Na$         |
| 839.1274     | 839.1309       | -4.2           | 20041.1   | $[M-4H+Na-SO_3-H_2O]^-$ |
| 849.1151     | 849.1186       | -4.1           | 328856.4  | $[M-4H+Na-2CO_2]^-$     |
| 893.1049     | 893.1079       | -3.4           | 1227829.5 | $[M-4H+Na-CO_2]^-$      |
| 937.0947     | 937.0972       | -2.7           | 158982    | $[M-4H+Na]^-$           |

Table S17: Fragment ion list for 213 nm UVPD activation of the [M-3H]<sup>3-</sup> precursor of DS dp4 in the high-pressure cell (50 ms).

| Measured m/z | Calculated m/z | Accuracy (PPM) | Intensity | Assigned Fragment                                     |
|--------------|----------------|----------------|-----------|-------------------------------------------------------|
| 237.5332     | 237.5321       | 4.4            | 6723.1    | Y <sub>2</sub> <sup>2-</sup>                          |
| 282.0301     | 282.0289       | 4.2            | 423403.3  | Z <sub>1</sub>                                        |
| 305.0403     | 305.0382       | 6.8            | 3.50E+07  | [M-3H] <sup>3-</sup>                                  |
| 316.5452     | 316.5429       | 7.2            | 7486.9    | C <sub>3</sub> <sup>2-</sup>                          |
| 357.0385     | 357.0379       | 1.5            | 20369.2   | <sup>2,5</sup> X <sub>1</sub> '                       |
| 371.0544     | 371.0536       | 2.2            | 74936.7   | <sup>0,3</sup> X <sub>1</sub> '                       |
| 379.0522     | 379.0502       | 5.2            | 25672.9   | Y <sub>3</sub> <sup>2-</sup>                          |
| 400.0553     | 400.0555       | -0.54          | 49641.2   | <sup>0,2</sup> X <sub>3</sub> <sup>2-</sup>           |
| 414.0731     | 414.0717       | 3.2            | 317054.1  | Z <sub>2</sub> -CO <sub>2</sub>                       |
| 414.0731     | 414.0717       | 3.2            | 317054.1  | C <sub>2</sub> -CO <sub>2</sub>                       |
| 435.0578     | 435.0582       | -1.1           | 992.9     | <sup>1,5</sup> A <sub>4</sub> <sup>2-</sup>           |
| 440.053      | 440.0504       | 5.8            | 9500.1    | B <sub>2</sub>                                        |
| 456.0475     | 456.0469       | 1.1            | 57571.7   | Z <sub>2</sub> "                                      |
| 456.0475     | 456.0469       | 1.1            | 57571.7   | C <sub>2</sub> "                                      |
| 457.5592     | 457.5576       | 3.3            | 115132    | [M-3H] <sup>2-</sup>                                  |
| 458.0625     | 458.0609       | 3.3            | 80651.5   | Z <sub>2</sub>                                        |
| 458.0625     | 458.0609       | 3.3            | 80651.5   | C <sub>2</sub>                                        |
| 458.0625     | 458.0609       | 3.3            | 80651.5   | [M-2H] <sup>2-</sup>                                  |
| 474.0582     | 474.0565       | 3.5            | 35859.6   | Y <sub>2</sub> "                                      |
| 588.0893     | 588.0876       | 2.9            | 3066.1    | <sup>1,5</sup> A <sub>3</sub>                         |
| 677.1381     | 677.1359       | 3.2            | 5116      | Y <sub>3</sub> "-SO <sub>3</sub>                      |
| 775.1725     | 775.1739       | -1.8           | 3332.4    | [M-3H-SO <sub>4</sub> -CO <sub>2</sub> ] <sup>-</sup> |
| 800.1141     | 800.1113       | 3.5            | 23743.4   | <sup>0,2</sup> X <sub>3</sub> '                       |

Table S18: Fragment ion list for 213 nm UVPD activation of the  $[M-3H]^{3-}$  precursor of DS dp4 in the low-pressure cell (50 ms).

| Measured m/z | Calculated m/z | Accuracy (PPM) | Intensity | Assigned Fragment    |
|--------------|----------------|----------------|-----------|----------------------|
| 237.5322     | 237.5321       | 0.23           | 25591.9   | $Y_2^{2-}$           |
| 282.029      | 282.0289       | 0.31           | 376801.5  | $Z_1$                |
| 305.0385     | 305.0382       | 0.85           | 1.34E+07  | $[M-3H]^{3-}$        |
| 357.0372     | 357.0379       | -2.1           | 15926.8   | $^{2,5}X_1'$         |
| 379.0504     | 379.0502       | 0.43           | 57966.1   | $Y_3^{2-}$           |
| 435.0593     | 435.0582       | 2.4            | 1136.4    | $^{1,5}A_4^{2-}$     |
| 440.0507     | 440.0504       | 0.6            | 18277.4   | $B_2$                |
| 458.0608     | 458.0609       | -0.43          | 62375.6   | $Z_2$                |
| 458.0608     | 458.0609       | -0.43          | 62375.6   | $[M-2H]^{2-}$        |
| 458.0608     | 458.0609       | -0.43          | 62375.6   | $C_2$                |
| 474.0561     | 474.0565       | -0.97          | 29513.2   | $Y_2''$              |
| 775.1706     | 775.1739       | -4.3           | 3723.3    | $[M-3H-SO_4-CO_2]^-$ |
| 800.111      | 800.1113       | -0.37          | 21056     | $^{0,2}X_3'$         |

Table S19: Fragment ion list for 213 nm UVPD activation of the [M-3H]<sup>3-</sup> precursor of DS dp4 in the high-pressure cell (150 ms).

| Measured m/z | Calculated m/z | Accuracy (PPM) | Intensity | Assigned Fragment                                     |
|--------------|----------------|----------------|-----------|-------------------------------------------------------|
| 237.5329     | 237.5321       | 3.2            | 76668.1   | Y <sub>2</sub> <sup>2-</sup>                          |
| 282.0298     | 282.0289       | 3.2            | 7391485.5 | Z <sub>1</sub>                                        |
| 300.0408     | 300.0394       | 4.4            | 125171.5  | Y <sub>1</sub>                                        |
| 305.0401     | 305.0382       | 6.1            | 2.20E+08  | [M-3H] <sup>3-</sup>                                  |
| 316.5446     | 316.5429       | 5.4            | 94324.7   | C <sub>3</sub> <sup>2-</sup>                          |
| 328.0354     | 328.0343       | 3.1            | 233104.1  | <sup>1,5</sup> X <sub>1</sub>                         |
| 342.051      | 342.0500       | 2.8            | 44843.4   | <sup>0,2</sup> X <sub>1</sub>                         |
| 357.0383     | 357.0379       | 0.98           | 335265.5  | <sup>2,5</sup> X <sub>1</sub> '                       |
| 372.058      | 372.0606       | -7             | 65620     | <sup>0,3</sup> X <sub>1</sub> '                       |
| 379.0516     | 379.0502       | 3.6            | 458945.8  | Y <sub>3</sub> <sup>2-</sup>                          |
| 400.055      | 400.0555       | -1.3           | 1026168.4 | <sup>0,2</sup> X <sub>3</sub> <sup>2-</sup>           |
| 414.0726     | 414.0717       | 2              | 5869078   | Z <sub>2</sub> -CO <sub>2</sub>                       |
| 414.0726     | 414.0717       | 2              | 5869078   | C <sub>2</sub> -CO <sub>2</sub>                       |
| 435.0593     | 435.0582       | 2.4            | 3672126   | <sup>1,5</sup> A <sub>4</sub> <sup>2-</sup>           |
| 440.0523     | 440.0504       | 4.2            | 138030.9  | B <sub>2</sub>                                        |
| 456.0471     | 456.0469       | 0.24           | 1099505.1 | Z <sub>2</sub> "                                      |
| 456.0471     | 456.0469       | 0.24           | 1099505.1 | C <sub>2</sub> "                                      |
| 457.5588     | 457.5576       | 2.4            | 2260667.8 | [M-3H] <sup>2-</sup>                                  |
| 458.0618     | 458.0609       | 1.7            | 1614808.9 | Z <sub>2</sub>                                        |
| 458.0618     | 458.0609       | 1.7            | 1614808.9 | [M-2H] <sup>2-</sup>                                  |
| 458.0618     | 458.0609       | 1.7            | 1614808.9 | C <sub>2</sub>                                        |
| 474.0577     | 474.0565       | 2.4            | 681351    | Y <sub>2</sub> "                                      |
| 504.0676     | 504.0664       | 2.2            | 31038.9   | <sup>1,5</sup> X <sub>2</sub>                         |
| 588.0897     | 588.0876       | 3.6            | 63162.5   | <sup>1,5</sup> A <sub>3</sub>                         |
| 677.1378     | 677.1359       | 2.8            | 117259.2  | Y <sub>3</sub> "-SO <sub>3</sub>                      |
| 775.172      | 775.1739       | -2.5           | 228915.2  | [M-3H-SO <sub>4</sub> -CO <sub>2</sub> ] <sup>-</sup> |
| 800.1134     | 800.1113       | 2.6            | 452784.7  | <sup>0,2</sup> X <sub>3</sub> '                       |

Table S20: Fragment ion list for 213 nm UVPD activation of the [M-3H]<sup>3-</sup> precursor of DS dp4 in the high-pressure cell (300 ms).

| Measured m/z | Calculated m/z | Accuracy (PPM) | Intensity | Assigned Fragment                                     |
|--------------|----------------|----------------|-----------|-------------------------------------------------------|
| 198.9921     | 198.9917       | 1.5            | 40082.5   | <sup>1,3</sup> X <sub>0</sub>                         |
| 237.5327     | 237.5321       | 2.3            | 72358.8   | Y <sub>2</sub> <sup>2-</sup>                          |
| 282.0295     | 282.0289       | 2.1            | 9184308   | Z <sub>1</sub>                                        |
| 300.0404     | 300.0394       | 3.1            | 263792.7  | Y <sub>1</sub>                                        |
| 305.0396     | 305.0382       | 4.5            | 1.25E+08  | [M-3H] <sup>3-</sup>                                  |
| 328.0351     | 328.0343       | 2.2            | 327671.6  | <sup>1,5</sup> X <sub>1</sub>                         |
| 342.0506     | 342.0500       | 1.6            | 124282.4  | <sup>0,2</sup> X <sub>1</sub>                         |
| 358.0414     | 358.0449       | -9.9           | 46280.9   | <sup>2,5</sup> X <sub>1</sub> '                       |
| 372.0565     | 372.0606       | -11            | 92391.4   | <sup>0,3</sup> X <sub>1</sub> '                       |
| 377.5278     | 377.5265       | 3.2            | 20384.1   | <sup>2,4</sup> A <sub>4</sub> <sup>2-</sup>           |
| 379.0511     | 379.0502       | 2.3            | 607442.9  | Y <sub>3</sub> <sup>2-</sup>                          |
| 400.0545     | 400.0555       | -2.5           | 1429674.9 | <sup>0,2</sup> X <sub>3</sub> <sup>2-</sup>           |
| 414.0722     | 414.0717       | 0.99           | 8176075.5 | Z <sub>2</sub> -CO <sub>2</sub>                       |
| 414.0722     | 414.0717       | 0.99           | 8176075.5 | C <sub>2</sub> -CO <sub>2</sub>                       |
| 435.0596     | 435.0582       | 3.1            | 23605.7   | <sup>1,5</sup> A <sub>4</sub> <sup>2-</sup>           |
| 440.0518     | 440.0504       | 3.1            | 163650.5  | B <sub>2</sub>                                        |
| 456.0466     | 456.0469       | -0.85          | 1577052.9 | Z <sub>2</sub> "                                      |
| 456.0466     | 456.0469       | -0.85          | 1577052.9 | C <sub>2</sub> "                                      |
| 457.5583     | 457.5576       | 1.3            | 3198577.5 | [M-3H] <sup>2-</sup>                                  |
| 458.0611     | 458.0609       | 0.22           | 2480923.3 | Z <sub>2</sub>                                        |
| 458.0611     | 458.0609       | 0.22           | 2480923.3 | [M-2H] <sup>2-</sup>                                  |
| 458.0611     | 458.0609       | 0.22           | 2480923.3 | C <sub>2</sub>                                        |
| 474.0572     | 474.0565       | 1.4            | 998110.1  | Y <sub>2</sub> "                                      |
| 504.0675     | 504.0664       | 2              | 55947.7   | <sup>1,5</sup> X <sub>2</sub>                         |
| 573.0823     | 573.0886       | -11            | 2330.8    | <sup>2,5</sup> X <sub>2</sub> "                       |
| 575.1074     | 575.1036       | -6.6           | 10056.4   | <sup>2,5</sup> X <sub>2</sub>                         |
| 588.0892     | 588.0876       | 2.7            | 93418.8   | <sup>1,5</sup> A <sub>3</sub>                         |
| 619.131      | 619.1298       | 1.9            | 1550      | <sup>2,4</sup> X <sub>2</sub>                         |
| 634.0949     | 634.0930       | 2.9            | 100005.6  | C <sub>3</sub>                                        |
| 677.1371     | 677.1359       | 1.8            | 211551.5  | Y <sub>3</sub> "-SO <sub>3</sub>                      |
| 719.1479     | 719.1465       | 1.9            | 37529.5   | <sup>0,2</sup> X <sub>3</sub> "-SO <sub>3</sub>       |
| 775.1714     | 775.1739       | -3.2           | 348810.4  | [M-3H-SO <sub>4</sub> -CO <sub>2</sub> ] <sup>-</sup> |
| 791.1692     | 791.1682       | 1.3            | 142279.2  | [M-3H-SO <sub>3</sub> -CO <sub>2</sub> ] <sup>-</sup> |
| 800.1126     | 800.1113       | 1.6            | 687008.6  | <sup>0,2</sup> X <sub>3</sub> '                       |
| 817.1465     | 817.148        | -1.8           | 2505.6    | [M-3H-SO <sub>3</sub> -H <sub>2</sub> O] <sup>-</sup> |
| 835.1588     | 835.1580       | 0.92           | 33927.3   | [M-3H-SO <sub>3</sub> ] <sup>-</sup>                  |

Table S21: Fragment ion list for 213 nm UVPD activation of the [M-3H]<sup>3-</sup> precursor of DS dp4 in the high-pressure cell (400 ms).

| Measured m/z | Calculated m/z | Accuracy (PPM) | Intensity | Assigned Fragment                                            |
|--------------|----------------|----------------|-----------|--------------------------------------------------------------|
| 198.9917     | 198.9917       | -0.48          | 937290.9  | <sup>1,3</sup> X <sub>0</sub>                                |
| 237.5321     | 237.5321       | -0.18          | 1475916.5 | Y <sub>2</sub> <sup>2-</sup>                                 |
| 266.0339     | 266.0326       | 4.9            | 529746.9  | <sup>0,2</sup> X <sub>3</sub> <sup>13-</sup>                 |
| 282.0289     | 282.0289       | -0.03          | 2.65E+07  | Z <sub>1</sub>                                               |
| 300.0394     | 300.0394       | -0.25          | 3660405   | Y <sub>1</sub>                                               |
| 305.0382     | 305.0382       | -0.13          | 5.87E+07  | [M-3H] <sup>3-</sup>                                         |
| 316.5428     | 316.5429       | -0.33          | 342631.5  | C <sub>3</sub> <sup>2-</sup>                                 |
| 328.0343     | 328.0343       | -0.27          | 1862910.3 | <sup>1,5</sup> X <sub>1</sub>                                |
| 342.0499     | 342.0500       | -0.4           | 2212737   | 0,2X <sub>1</sub>                                            |
| 357.037      | 357.0379       | -2.7           | 1601530.4 | 2,5X <sub>1</sub> <sup>1</sup>                               |
| 371.0526     | 371.0536       | -2.7           | 7530043.5 | 0,3X <sub>1</sub> <sup>1</sup>                               |
| 377.5264     | 377.5265       | -0.51          | 42948     | <sup>2,4</sup> A <sub>4</sub> <sup>2-</sup>                  |
| 378.0423     | 378.0435       | -3.2           | 1696612.1 | Y <sub>3</sub> <sup>''2-</sup>                               |
| 379.0501     | 379.0502       | -0.36          | 6254056   | Y <sub>3</sub> <sup>2-</sup>                                 |
| 400.0538     | 400.0555       | -4.3           | 3270166.8 | <sup>0,2</sup> X <sub>3</sub> <sup>2-</sup>                  |
| 414.071      | 414.0717       | -1.9           | 26811848  | Z <sub>2</sub> -CO <sub>2</sub>                              |
| 414.071      | 414.0717       | -1.9           | 26811848  | C <sub>2</sub> -CO <sub>2</sub>                              |
| 435.0581     | 435.0582       | -0.36          | 202104.9  | <sup>1,5</sup> A <sub>4</sub> <sup>2-</sup>                  |
| 440.0504     | 440.0504       | -0.07          | 1519904.6 | B <sub>2</sub>                                               |
| 456.0452     | 456.0469       | -3.9           | 6185014   | Z <sub>2</sub> <sup>''</sup>                                 |
| 456.0452     | 456.0469       | -3.9           | 6185014   | C <sub>2</sub> <sup>''</sup>                                 |
| 457.5569     | 457.5576       | -1.7           | 6338524.5 | [M-3H] <sup>2-</sup>                                         |
| 458.0604     | 458.0609       | -1.3           | 7186134   | Z <sub>2</sub>                                               |
| 458.0604     | 458.0609       | -1.3           | 7186134   | [M-2H] <sup>2-</sup>                                         |
| 458.0604     | 458.0609       | -1.3           | 7186134   | C <sub>2</sub>                                               |
| 474.0558     | 474.0565       | -1.6           | 4013836   | Y <sub>2</sub> <sup>''</sup>                                 |
| 476.0714     | 476.0715       | -0.34          | 1698655.8 | Y <sub>2</sub>                                               |
| 504.0664     | 504.0664       | -0.15          | 660264.5  | <sup>1,5</sup> X <sub>2</sub>                                |
| 588.0876     | 588.0876       | -0.01          | 426564    | <sup>1,5</sup> A <sub>3</sub>                                |
| 619.1296     | 619.1298       | -0.33          | 13311.4   | <sup>2,4</sup> X <sub>2</sub>                                |
| 634.0931     | 634.0930       | 0.02           | 430736.5  | C <sub>3</sub>                                               |
| 677.1353     | 677.1359       | -0.88          | 2404114   | Y <sub>3</sub> <sup>''</sup> -SO <sub>3</sub>                |
| 719.1458     | 719.1465       | -0.97          | 955455.3  | <sup>0,2</sup> X <sub>3</sub> <sup>''</sup> -SO <sub>3</sub> |
| 775.1707     | 775.1739       | -4.1           | 461205.3  | [M-3H-SO <sub>4</sub> -CO <sub>2</sub> ] <sup>-</sup>        |
| 791.1671     | 791.1682       | -1.4           | 1145811.9 | [M-3H-SO <sub>3</sub> -CO <sub>2</sub> ] <sup>-</sup>        |
| 800.1103     | 800.1113       | -1.2           | 3441741.3 | <sup>0,2</sup> X <sub>3</sub> <sup>1</sup>                   |
| 817.1457     | 817.148        | -2.8           | 66057.8   | [M-3H-SO <sub>3</sub> -H <sub>2</sub> O] <sup>-</sup>        |
| 835.1567     | 835.1580       | -1.6           | 460815.9  | [M-3H-SO <sub>3</sub> ] <sup>-</sup>                         |
| 915.1133     | 915.1143       | -1.1           | 305314.3  | [M-3H] <sup>-</sup>                                          |

Table S22: Fragment ion list for 213 nm UVPD activation of the [M-3H]<sup>3-</sup> precursor of DS dp4 in the low-pressure cell (400 ms).

| Measured m/z | Calculated m/z | Accuracy (PPM) | Intensity | Assigned Fragment                                     |
|--------------|----------------|----------------|-----------|-------------------------------------------------------|
| 198.992      | 198.9917       | 1              | 54469.5   | <sup>1,3</sup> X <sub>0</sub>                         |
| 237.5326     | 237.5321       | 1.9            | 70144     | Y <sub>2</sub> <sup>2-</sup>                          |
| 266.0344     | 266.0326       | 6.8            | 125775.3  | <sup>0,2</sup> X <sub>3</sub> <sup>13-</sup>          |
| 282.0294     | 282.0289       | 1.7            | 9037220   | Z <sub>1</sub>                                        |
| 300.0401     | 300.0394       | 2.1            | 414498.3  | Y <sub>1</sub>                                        |
| 305.0394     | 305.0382       | 3.8            | 7.73E+07  | [M-3H] <sup>3-</sup>                                  |
| 316.5437     | 316.5429       | 2.5            | 89387.4   | C <sub>3</sub> <sup>2-</sup>                          |
| 328.0349     | 328.0343       | 1.6            | 372294.6  | <sup>1,5</sup> X <sub>1</sub>                         |
| 342.0504     | 342.0500       | 1.1            | 221333.5  | <sup>0,2</sup> X <sub>1</sub>                         |
| 358.0411     | 358.0449       | -11            | 51533.2   | <sup>2,5</sup> X <sub>1</sub> '                       |
| 372.0562     | 372.0606       | -12            | 114927.5  | <sup>0,3</sup> X <sub>1</sub> '                       |
| 377.5275     | 377.5265       | 2.4            | 23318     | <sup>2,4</sup> A <sub>4</sub> <sup>2-</sup>           |
| 379.0509     | 379.0502       | 1.7            | 713679.8  | Y <sub>3</sub> <sup>2-</sup>                          |
| 400.0543     | 400.0555       | -3             | 1561209.5 | <sup>0,2</sup> X <sub>3</sub> <sup>2-</sup>           |
| 414.0719     | 414.0717       | 0.26           | 8909531   | Z <sub>2</sub> -CO <sub>2</sub>                       |
| 414.0719     | 414.0717       | 0.26           | 8909531   | C <sub>2</sub> -CO <sub>2</sub>                       |
| 435.0592     | 435.0582       | 2.2            | 32272.3   | <sup>1,5</sup> A <sub>4</sub> <sup>2-</sup>           |
| 440.0515     | 440.0504       | 2.4            | 171774.2  | B <sub>2</sub>                                        |
| 456.0463     | 456.0469       | -1.5           | 1751302.5 | Z <sub>2</sub> "                                      |
| 456.0463     | 456.0469       | -1.5           | 1751302.5 | C <sub>2</sub> "                                      |
| 457.5581     | 457.5576       | 0.89           | 3460587.5 | [M-3H] <sup>2-</sup>                                  |
| 458.0608     | 458.0609       | -0.43          | 2780777.3 | Z <sub>2</sub>                                        |
| 458.0608     | 458.0609       | -0.43          | 2780777.3 | [M-2H] <sup>2-</sup>                                  |
| 458.0608     | 458.0609       | -0.43          | 2780777.3 | C <sub>2</sub>                                        |
| 476.0724     | 476.0715       | 1.8            | 210474.1  | Y <sub>2</sub> <sup>2-</sup>                          |
| 504.0673     | 504.0664       | 1.6            | 85287.7   | <sup>1,5</sup> X <sub>2</sub>                         |
| 573.0821     | 573.0886       | -11            | 51388.5   | <sup>2,5</sup> X <sub>2</sub> "                       |
| 588.089      | 588.0876       | 2.4            | 110024.5  | <sup>1,5</sup> A <sub>3</sub>                         |
| 619.1309     | 619.1298       | 1.8            | 2101.3    | <sup>2,4</sup> X <sub>2</sub>                         |
| 634.0947     | 634.0930       | 2.5            | 120173.9  | C <sub>3</sub>                                        |
| 677.1367     | 677.1359       | 1.2            | 313029.1  | Y <sub>3</sub> "-SO <sub>3</sub>                      |
| 719.1473     | 719.1465       | 1.1            | 73862.1   | <sup>0,2</sup> X <sub>3</sub> "-SO <sub>3</sub>       |
| 775.171      | 775.1739       | -3.7           | 112104.8  | [M-3H-SO <sub>4</sub> -CO <sub>2</sub> ] <sup>-</sup> |
| 791.1686     | 791.1682       | 0.5            | 222651.9  | [M-3H-SO <sub>3</sub> -CO <sub>2</sub> ] <sup>-</sup> |
| 800.1122     | 800.1113       | 1.1            | 807399.1  | <sup>0,2</sup> X <sub>3</sub> '                       |
| 817.1459     | 817.148        | -2.6           | 4722.2    | [M-3H-SO <sub>3</sub> -H <sub>2</sub> O] <sup>-</sup> |
| 835.1584     | 835.1580       | 0.44           | 47343.2   | [M-3H-SO <sub>3</sub> ] <sup>-</sup>                  |
| 915.1148     | 915.1143       | 0.54           | 41853.7   | [M-3H] <sup>-</sup>                                   |

Table S23: MS<sup>3</sup> activation of the fragment ion m/z 715.05 of DS dp4 using 193 nm UVPD (8 pulses, 4 mJ)/ 193 nm UVPD (8 pulses, 4 mJ).

| Measured m/z | Calculated m/z | Accuracy (PPM) | Intensity | Assigned Fragment                                                 |
|--------------|----------------|----------------|-----------|-------------------------------------------------------------------|
| 175.0246     | 175.0248       | -1.1           | 77009.5   | C <sub>1</sub>                                                    |
| 272.992      | 272.9916       | 1.5            | 101466.1  | [Y <sub>2</sub> /C <sub>3</sub> ]+SO <sub>3</sub>                 |
| 282.0287     | 282.0289       | -0.74          | 132838.8  | Z <sub>1</sub>                                                    |
| 325.032      | 325.0291       | 8.9            | 2086.7    | [ <sup>1,4</sup> A <sub>3</sub> '/Z <sub>3</sub> '] <sup>2-</sup> |
| 396.1143     | 396.1147       | -1.1           | 55170.3   | C <sub>3</sub> /Y <sub>2</sub> -SO <sub>3</sub>                   |
| 440.0499     | 440.0504       | -1.2           | 322608.3  | B <sub>2</sub>                                                    |
| 456.0603     | 456.0609       | -1.5           | 31145.2   | Z <sub>2</sub> "                                                  |
| 456.0603     | 456.0609       | -1.5           | 31145.2   | C <sub>2</sub> "                                                  |
| 476.071      | 476.0715       | -1.2           | 456067.5  | Y <sub>2</sub>                                                    |
| 518.0816     | 518.0821       | -1             | 134232.8  | C <sub>3</sub> / <sup>0,2</sup> X <sub>2</sub>                    |
| 554.1356     | 554.1363       | -1.3           | 158272.3  | C <sub>3</sub> -SO <sub>3</sub>                                   |
| 590.0663     | 590.0674       | -1.9           | 459146.9  | C <sub>3</sub> -C <sub>2</sub> H <sub>4</sub> O                   |
| 634.0924     | 634.0931       | -1.1           | 5880742   | C <sub>3</sub>                                                    |
| 715.0571     | 715.0571       | -0.12          | 5776643   | C <sub>3</sub> +HSO <sub>3</sub>                                  |



Table S24: MS<sup>3</sup> activation of the fragment ion m/z 715.05 of DS dp4 using 193 nm UVPD (8 pulses, 4 mJ)/HCD (NCE 20).

| Measured m/z | Calculated m/z | Accuracy (PPM) | Intensity | Assigned Fragment                                 |
|--------------|----------------|----------------|-----------|---------------------------------------------------|
| 272.9922     | 272.9916       | 2.2            | 218682.5  | [Y <sub>2</sub> /C <sub>3</sub> ]+SO <sub>3</sub> |
| 282.0289     | 282.0289       | -0.03          | 31981     | Z <sub>1</sub>                                    |
| 440.0503     | 440.0504       | -0.3           | 490020.3  | B <sub>2</sub>                                    |
| 476.0714     | 476.0715       | -0.34          | 60841.8   | Y <sub>2</sub>                                    |
| 616.0821     | 616.0825       | -0.64          | 11841     | B <sub>3</sub>                                    |
| 634.093      | 634.0931       | -0.15          | 20435110  | C <sub>3</sub>                                    |

Table S25: MS<sup>3</sup> activation of the fragment ion m/z 715.05 of CS-A dp4 using 193 nm UVPD (8 pulses, 4 mJ)/ 193 nm UVPD (8 pulses, 4 mJ).

| Measured m/z | Calculated m/z | Accuracy (PPM) | Intensity | Assigned Fragment                                  |
|--------------|----------------|----------------|-----------|----------------------------------------------------|
| 175.0246     | 175.0248       | -1.1           | 25957.2   | C <sub>1</sub>                                     |
| 272.9918     | 272.9916       | 0.73           | 58237.1   | [Y <sub>2</sub> /C <sub>3</sub> ]+SO <sub>3</sub>  |
| 282.0285     | 282.0289       | -1.5           | 42349.1   | Z <sub>1</sub>                                     |
| 396.1145     | 396.1147       | -0.62          | 25369.6   | C <sub>3</sub> /Y <sub>2</sub> -SO <sub>3</sub>    |
| 440.0498     | 440.0504       | -1.4           | 99417.8   | B <sub>2</sub>                                     |
| 456.0445     | 456.0469       | -5.3           | 23296.5   | C <sub>2</sub> "                                   |
| 456.0445     | 456.0469       | -5.3           | 23296.5   | Z <sub>2</sub> "                                   |
| 476.0709     | 476.0715       | -1.4           | 109280.8  | Y <sub>2</sub>                                     |
| 518.0809     | 518.0821       | -2.3           | 29465.8   | C <sub>3</sub> <sup>0,2</sup> X <sub>2</sub>       |
| 554.1354     | 554.1363       | -1.6           | 53173.5   | C <sub>3</sub> -SO <sub>3</sub>                    |
| 590.066      | 590.0674       | -2.4           | 81207.7   | C <sub>3</sub> -C <sub>3</sub> H <sub>4</sub> O    |
| 616.082      | 616.0825       | -0.81          | 15116.6   | B <sub>3</sub>                                     |
| 634.0922     | 634.0931       | -1.4           | 1258890.4 | C <sub>3</sub>                                     |
| 697.0464     | 697.0472       | -1.1           | 26059.2   | C <sub>3</sub> +HSO <sub>3</sub> -H <sub>2</sub> O |
| 715.056      | 715.0571       | -1.7           | 1330775.6 | C <sub>3</sub> +HSO <sub>3</sub>                   |

Table S26: MS<sup>3</sup> activation of the fragment ion m/z 715.05 of CS-A dp4 using 193 nm UVPD (8 pulses, 4 mJ)/ HCD (NCE 20).

| Measured m/z | Calculated m/z | Accuracy (PPM) | Intensity | Assigned Fragment                                 |
|--------------|----------------|----------------|-----------|---------------------------------------------------|
| 272.9919     | 272.9916       | 1.1            | 168492.5  | [Y <sub>2</sub> /C <sub>3</sub> ]+SO <sub>3</sub> |
| 282.0284     | 282.0289       | -1.8           | 21308.3   | Z <sub>1</sub>                                    |
| 440.0497     | 440.0504       | -1.7           | 234610.4  | B <sub>2</sub>                                    |
| 476.0708     | 476.0715       | -1.6           | 62210.2   | Y <sub>2</sub>                                    |
| 504.0658     | 504.0665       | -1.4           | 20400.4   | <sup>1,5</sup> X <sub>2</sub>                     |
| 616.0815     | 616.0825       | -1.6           | 23458.2   | B <sub>3</sub>                                    |
| 634.0922     | 634.0931       | -1.4           | 479585.7  | C <sub>3</sub>                                    |
